# Image Processing and Quality Control for the first 10,000 Brain Imaging Datasets from UK Biobank

Fidel Alfaro-Almagro<sup>a,\*</sup>, Mark Jenkinson<sup>a</sup>, Neal K. Bangerter<sup>b</sup>, Jesper L. R. Andersson<sup>a</sup>, Ludovica Griffanti<sup>a</sup>, Gwenaëlle Douaud<sup>a</sup>, Stamatios N. Sotiropoulos<sup>a,c</sup>, Saad Jbabdi<sup>a</sup>, Moises Hernandez-Fernandez<sup>a</sup>, Emmanuel Vallee<sup>a</sup>, Diego Vidaurre<sup>d</sup>, Matthew Webster<sup>a</sup>, Paul McCarthy<sup>a</sup>, Christopher Rorden<sup>e</sup>, Alessandro Daducci<sup>f,g</sup>, Daniel C. Alexander<sup>h</sup>, Hui Zhang<sup>h</sup>, Iulius Dragoni<sup>i</sup>, Paul M. Matthews<sup>j</sup>, Karla L. Miller<sup>a</sup>, Stephen M. Smith<sup>a</sup>

<sup>a</sup>*Oxford Centre for Functional MRI of the Brain, University of Oxford, Oxford, UK*

<sup>b</sup>*Electrical and Computer Engineering, Brigham Young University, UT, USA*

<sup>c</sup>*Sir Peter Mansfield Imaging Centre, School of Medicine, University of Nottingham, UK*

<sup>d</sup>*Oxford Centre for Human Brain Activity, University of Oxford, Oxford, UK*

<sup>e</sup>*Department and Psychology and McCausland Center for Brain Imaging, University of South Carolina, SC, USA*

<sup>f</sup>*Computer Science department, University of Verona, ITALY*

<sup>g</sup>*Radiology department, University Hospital Center, SWITZERLAND*

<sup>h</sup>*Centre for Medical Image Computing, Department of Computer Science, University College London, UK*

<sup>i</sup>*Siemens Healthcare, Surrey, UK*

<sup>j</sup>*Division of Brain Sciences, Imperial College, London, UK*

---

## Abstract

UK Biobank is a large-scale prospective epidemiological study with all data accessible to researchers worldwide. It is currently in the process of bringing back 100,000 of the original participants for brain, heart and body MRI, carotid ultrasound and low-dose bone/fat x-ray. The brain imaging component covers 6 modalities (T1, T2 FLAIR, susceptibility weighted MRI, Resting fMRI, Task fMRI and Diffusion MRI). Raw and processed data from the first 10,000 imaged subjects has recently been released for general research access. To help convert this data into useful summary information we have developed an automated processing and QC (Quality Control) pipeline that is available for use by other researchers. In this paper we describe the pipeline in detail, following a brief overview of UK Biobank brain imaging and the acquisition protocol. We also describe several quantitative investigations carried out as part of the development of both the imaging protocol and the processing pipeline.

*Keywords:* Epidemiological studies, Image analysis pipeline, Multi-modal data integration, Quality control, Big data imaging, Machine learning.

---

## 1. Introduction

### 1.1. Biobank Project

UK Biobank is a prospective cohort study of over 500,000 individuals from across the United Kingdom (Sudlow et al. (2015)). Voluntary participants, aged between 40 and 69 when recruited in 2006–2010, were invited to one of 22 centres across the UK. Blood, urine and saliva samples were collected, samples for genetic analysis and physical

---

\*Corresponding author.

Email address: [falmagro@fmrib.ox.ac.uk](mailto:falmagro@fmrib.ox.ac.uk) (Fidel Alfaro-Almagro)

URL: <https://www.ndcn.ox.ac.uk/team/fidel-alfaroalmagro> (Fidel Alfaro-Almagro)

measurements were taken, and each individual answered an extensive questionnaire focused on aspects of health and lifestyle. This valuable data resource will provide insight into how the health of the UK population develops over many years and will enable researchers to improve the diagnosis and treatment of common diseases which will inevitably occur in sub-groups of the population.

In 2014, UK Biobank began the process of inviting back 100,000 of the original volunteers for brain, heart and body imaging. Imaging data for 10,000 volunteers has already been processed and made available for further research (Biobank, 2016, 2017). Due to the wide scope (in population size and number of imaging modalities) of the brain imaging acquisitions, UK Biobank will become an important resource for the research community. The included modalities are T1 (Section 2.2.2), T2 FLAIR (Section 2.2.3), swMRI (susceptibility-weighted MRI, Section 2.2.4), dMRI (diffusion MRI, Section 2.2.6), rfMRI (resting-state functional MRI, Section 2.2.7) and tfMRI (task fMRI, Section 2.2.8). Section 2.1 briefly describes the acquisition protocol and the acquired modalities.

Other recent large-scale imaging projects include the Maastricht Study with 10,000 subjects (Schram et al. (2014)), the German National Cohort with 30,000 subjects (GNC (2014)) and the Rhineland Study with 30,000 subjects (Breteler et al., 2014).

The full potential of UK Biobank stems from its access to NHS (UK National Health Service) records; participants have agreed for their future health outcome information to be linked into the UK Biobank database. Thanks to this, researchers can aim to find novel biomarkers for early diagnosis of different diseases. As shown in Sudlow et al. (2015), 1,800 of the imaged participants are expected to develop Alzheimer’s disease by 2022, rising to 6,000 by 2027 (diabetes: 8,000 rising to 14,000; stroke: 1,800 to 4,000; Parkinson’s: 1,200 to 2,800).

Greater detail regarding the background to the UK Biobank brain imaging study is given in Miller et al. (2016), a resource paper that also provides an introduction to the types of biological information that can be extracted from the different brain imaging modalities, as well as example results from early analyses from the first 5,000 subjects’ data, and detailed discussions of the challenges of analysing and interpreting such datasets. In contrast, here we focus more specifically on the methodological advances and implementation details in the image processing and QC pipeline that we have developed for UK Biobank; we describe here version 1.0 of “FBP” (FMRIB’s Biobank Pipeline), used to generate the first 10,000 subjects’ processed and released data, as of January 2017. We also include several investigations relating to acquisition and analysis pipeline decisions (such as  $b=0$  shimming approaches and registration method for dMRI data), with analyses designed to evaluate relative merits of different approaches.

## 1.2. Automated Pipeline

Brain imaging data is not immediately usable for research purposes in its raw form. It needs to be processed using a wide variety of software tools, optimised and combined together into a processing pipeline.

There are many excellent examples of processing pipelines in the literature. Tools like Wei et al. (2002) (segmentation), Cook et al. (2006) (diffusion) or Song et al. (2011) (resting-state), are specific solutions for the processing of specific image modalities. However, for the UK Biobank we need a robust pipeline that can process and integrate across many different functional and structural modalities. The minimal preprocessing pipelines developed by the Human Connectome Project (HCP) (Glasser et al., 2013) are good examples of pipelines optimised for the specific needs of a project with very special characteristics. Following the same philosophy, we have developed a fully automated processing pipeline primarily based on FSL software (Jenkinson et al., 2012). In Section 2.2 we describe the pipeline in detail, as well as the choices we have made in its development.

## 1.3. Imaging-Derived Phenotypes and Quality Control

A goal of UK Biobank is to identify new relationships between different phenotypic features and human diseases, in the hope that they may be used as biomarkers for early diagnosis. Therefore, in addition to preprocessing the

brain imaging data (e.g., aligning modalities and removing artefacts), our pipeline also generates approximately 4350 “imaging-derived phenotypes” (IDPs). These IDPs include summary measures such as subcortical structure volumes, microstructural measures in major tracts (DTI and NODDI measures (Zhang et al., 2012)), and structural/functional connectivity metrics. IDPs for the first 5,000 subjects have been publicly released<sup>1</sup> and can be used in combination with other non-imaging data from Biobank to identify disease risk factors and biomarkers. IDPs are further described in Section 2.3.

Quality Control (QC) is a very important issue in brain imaging as its application (or lack thereof) can compromise the trustworthiness of a study (Bennett and Miller, 2010). This topic has been explored in the literature, although very often research is mostly focused on Quality Assurance (QA) rather than QC. QA is focused on avoiding the occurrence of problems by improving a process while QC is focused on finding possible problems in the output of that process. For example, the Function Biomedical Informatics Research Network (FBIRN) set of recommendations (Glover et al., 2012) is solely focused on QA. In a similar vein, Friedman and Glover (2006) explore an interesting set of quality metrics, but they focus on stability, signal-to-noise ratio (SNR), drift, and other hardware performance issues related to MR scanners, not specifically on the type of artefacts<sup>2</sup> that can be found in MR imaging even when complying with the best QA policies.

The scale of a typical brain imaging study to date (up to 100 subjects) allows researchers to largely perform QC manually, by visually inspecting the data at each step in the processing pipeline. Even the HCP, while having a relatively large number of subjects (1200), relies primarily upon visual inspection for their T1 QC process (Marcus et al., 2013). However, the sheer quantity of imaging data which will be produced by UK Biobank (100,000 subjects) makes QC via visual inspection infeasible. Thus, the development of reliable QC metrics to detect artefacts specific to the imaging acquisition and analysis process is essential.

Various imaging related QC metrics have been proposed (e.g. Deshmukh and Bhosale (2010), Moorthy and Bovik (2010)) but, as they are not specific to MR or brain imaging they do not fulfil the needs of our study. More specific proposals can be found in other studies. Woodard and Carley-Spencer (2006) suggests a metric based on Natural Scene Statistics to detect noise in structural images. Following the same idea, Mortamet et al. (2009) suggests two metrics to detect noise (based on investigating the ratio of artefactual voxels relative to the background, or the noise distribution in the background). Those proposals, although extremely useful, refer to a very specific problem in structural images, and hence are unlikely to detect artefacts due to other sources, or in other modalities.

Similarly, there have been proposed metrics for dMRI (Hasan, 2007; Liu et al., 2010), fMRI (Greve et al., 2011; Power et al., 2012; Nichols, 2013; Afyouni and Nichols, 2017), and more recent multimodal approaches (Abe et al., 2015), but the extent to which these metrics may capture the majority of artefacts that could arise is yet to be proven.

Finally, PCPQAP (Craddock et al., 2016) is a concerted effort to create a unified platform for Quality Control that attempts to incorporate different QC pipelines and their associated metrics. The QC tools to come out of our work are designed to be easily integrated into MRIQC (Esteban et al., 2016, 2017), a project affiliated to PCPQAP.

Due to the uncertainty about the suitability of the QC metrics discussed above to successfully assess image quality objectively and to detect the majority of brain artefacts, we propose a machine learning approach to automatically identify problematic images based on a wide range of imaging derived metrics. For this study, the generated IDPs are combined with a collection of additional QC-specific metrics (e.g., measures of asymmetry, normalised intensity per subcortical structure, metrics to detect alignment that classifies images as usable or non-usable). This has been developed for, and tested on, T1 images, but will be further developed in future work so that it can be applied to all modalities. Section 2.4 further describes the QC-specific metrics and the machine learning system.

---

<sup>1</sup>The raw and processed imaging data, IDPs and non-imaging measures in UK Biobank are available to researchers worldwide following a data access application procedure.

<sup>2</sup>A comprehensive list of possible artefacts and proposed qualitative quality recommendations can be found in CBS (2016).

## 2. Methods

### 2.1. Data

UK Biobank brain imaging has been described as a resource in [Miller et al. \(2016\)](#), where the reader can find a number of examples describing how it can be accessed and used for research. The data is available online<sup>3</sup>.

#### 2.1.1. Acquisition Hardware and Process

Three dedicated imaging centres (the second and third centres will open during 2017) will be equipped with identical scanners (3T Siemens Skyra, software VD13) for brain imaging scanning using the standard Siemens 32-channel receive head coil. As shown in multiple studies ([Focke et al., 2011](#); [Chen et al., 2014](#)), having the same scanner and protocol is advantageous for a multi-site study.

The scanners will operate 7 days per week, each scanning 18 subjects per day. These acquisition rates demand an extremely time-efficient protocol - each minute of scanning (added into the protocol) in effect costs £1 million, so scanning time has been a key criterion in the protocol development. The total scanning time has been established as 31 minutes (plus 5 minutes for subject adjustment, shimming, etc). The optimised order of acquisition is: (1) T1, (2) resting fMRI, (3) task fMRI, (4) T2 FLAIR, (5) dMRI, (6) swMRI ([Biobank, 2014](#)).

During the acquisition process, if a significant artefact is observed while scanning, and there is enough time to restart the sequence, then the acquisition may be repeated. This detail will be considered in Section 2.2.1. The most common reason for these artefacts is excessive head movement.

Likewise, as mentioned in [Miller et al. \(2016\)](#), in case of a possible health-related incidental finding noted by the radiographer during the imaging process, a formal radiologist review is undertaken and, if it is confirmed as potentially serious, feedback is given to the participant and their doctor.

#### 2.1.2. Protocol description

Up to the writing of this work, our processing pipeline has been applied to 10,129 UK Biobank volunteers scanned from 2014 to 2016. The main acquisition parameters for each modality are listed in Table 1.

A usable T1-weighted image was obtained for 98% of these 10,000 subjects (the same figure that was reported in [Miller et al. \(2016\)](#) for the initial 6000 subjects, confirming the stability of the acquisition process). This is an important point, as a T1 image is a crucial part of the processing pipeline, being essential for making full use of data from the other modalities. At this stage, an image was deemed unusable only after careful manual quality checks across all modalities<sup>4</sup>. A set of categories, specific to each modality, were assigned to every image; these categories are described in section 2.4.1. Data for all modalities were acquired and usable in 8211 subjects (80.06%).

Throughout the development of the Biobank imaging procedures, the imaging acquisition has been divided into five protocol phases, with each phase corresponding to (generally minor early) adjustments in the acquisition protocol. The original aim in the UK Biobank brain imaging component was to maintain a fixed acquisition protocol during the 5-6 years that the scanning will need or, at least, to have maximum compatibility with eventual changes. However, very early improvements in the dMRI and T2 FLAIR protocols were found to be valuable, resulting in large enough data improvements to outweigh the priority of keeping the protocol fixed (and taking into account the relatively small numbers of datasets affected). This change was made at the beginning of protocol “Phase 3”. The different phases are described in detail below.

<sup>3</sup><https://amsportal.ukbiobank.ac.uk/sitepages/sign%20in.aspx> .

<sup>4</sup>Manual QC was possible because at that stage, we were dealing with the initial phase (6% of final dataset size)

Table 1: UK Biobank brain MRI protocol (31 minutes total scan time).

| Modality    | Duration | Voxel, Matrix                                                        | Key Parameters                                                                                                                                                                 |
|-------------|----------|----------------------------------------------------------------------|--------------------------------------------------------------------------------------------------------------------------------------------------------------------------------|
| T1          | 4:54     | $1 \times 1 \times 1\text{mm}$<br>$208 \times 256 \times 256$        | 3D MPRAGE, sagittal, R=2,<br>TI/TR=880/2000 ms                                                                                                                                 |
| T2<br>FLAIR | 5:52     | $1.05 \times 1.0 \times 1.0\text{mm}$<br>$192 \times 256 \times 256$ | FLAIR, 3D SPACE, sagittal,<br>R=2, PF 7/8, fat sat,<br>TI/TR=1800/5000 ms, elliptical                                                                                          |
| swMRI       | 2:34     | $0.8 \times 0.8 \times 3.0\text{mm}$<br>$256 \times 288 \times 48$   | 3D GRE, axial, R=2, PF 7/8<br>TE1/TE2/TR=9.4/20/27ms                                                                                                                           |
| dMRI        | 7:08     | $2.0 \times 2.0 \times 2.0\text{mm}$<br>$104 \times 104 \times 72$   | MB=3, R=1, TE/TR=92/3600<br>ms, PF 6/8, fat sat, $b=0 \text{ s/mm}^2$<br>(5x + 3x phase-encoding<br>reversed), $b=1000 \text{ s/mm}^2$ (50x),<br>$b=2000 \text{ s/mm}^2$ (50x) |
| rfMRI       | 6:10     | $2.4 \times 2.4 \times 2.4\text{mm}$<br>$88 \times 88 \times 64$     | TE/TR=39/735 ms, MB=8,<br>R=1, flip angle $52^\circ$ , fat sat                                                                                                                 |
| tfMRI       | 4:13     | $2.4 \times 2.4 \times 2.4\text{mm}$<br>$88 \times 88 \times 64$     | Acquisition same as rfMRI. Task<br>is faces/shapes “emotion” task.                                                                                                             |

R = in-plane acceleration factor, MB = multiband factor, PF=partial Fourier. All non-EPI scans are pre-scan normalised (on-scanner bias-field corrected). Gradient distortion correction is deselected on the scanner and applied in post-processing.

#### 2.1.2.1 Protocol Phase 1 - Up to 08/05/2014 - 11 subjects

Only 11 datasets were acquired within this initial phase, after which several major improvements were made in the protocol. These data sets have not been included in the imaging and IDP data sets that have been released.

#### 2.1.2.2 Protocol Phase 2 - 09/05/2014 to 11/08/2014 - 566 subjects

These datasets were acquired with a different protocol from Phase 1. One of the main features of this phase is the fact that all on-scanner gradient distortion correction was turned off as this does not work well in 3D for EPI acquisitions (thus, this step is done inside the processing pipeline, as described in Section 2.2.1).

An interesting difference in Phase 2 scans which does not present incompatibility problems is that rfMRI and tfMRI protocols had additional timepoints (approximately 30s) compared with later scans.

A number of improvements in Phase 3 for T2 FLAIR and dMRI make these acquisitions in Phase 2 incompatible with later phases. The raw T2 FLAIR and dMRI NIFTI images from Phase 2 have been made available via the UK Biobank database, but due to these incompatibilities, they have not been used in the full image processing pipeline, and were not used in the IDP (Image-Derived Phenotype) generation (See Section 2.3).

#### 2.1.2.3 Protocol Phase 3 - 12/08/2014 to 22/09/2014 - 260 subjects

This phase implemented some important changes. The range of intensity values in the T1 images was increased in the analog-to-digital conversion to make better use of the dynamic range of the 12-bit integer DICOM outputs. Therefore, intensities for this modality should be normalised when combining or comparing subjects from different phases.

T2 FLAIR switched to using elliptical k-space coverage to reduce acquisition time with no significant loss in image quality, and implemented 7/8 partial Fourier, which reduced image blurring with a small time penalty. This was an important change with respect to the previous phase, where Partial Fourier was set to 6/8.



dMRI acquisitions started using “monopolar” diffusion encoding from this phase. The reason for this decision is explained in Section 2.1.6. Other minor differences with Phase 2 dMRI scans are: one more diffusion encoding direction per shell (going from 7/49/49 to 8/50/50 for shells  $b = 0/1000/2000$ ), a reduced flip angle (78/160 instead of the previous 93/180), to avoid overflipping and improve B1 homogeneity and a reduced number of reversed encoding direction  $b=0$  images for use in EPI distortion correction (3 instead of the former 5).

#### 2.1.2.4 Protocol Phase 4 - 23/09/2014 to 26/11/2014 - 673 subjects

A number of minor changes were made between Phase 3 and 4:

- Three  $b=0$  scans were removed in dMRI (Going from 6 to 3).
- The T2 FLAIR was moved, within the protocol, to run after the fMRI scans.
- A new auto-shimming approach was put in place, with a reduced shimming field-of-view and fewer shim iterations.

Some tests, described below, were performed in order to determine whether these changes resulted in any disruption to the data.

**Shimming change:** Shimming is the process of readjusting the homogeneity of a magnetic field during the scanning. In order to reduce the total acquisition time of the protocol<sup>5</sup>, the number of shimming iterations was reduced to one, performed at the beginning of the acquisition protocol. Two features relating to the fMRI EPI data, “warping extent” and “drop-out” were checked and compared in 100 subjects from before the change and 100 after the change. “Warping extent” refers to the size (in voxels) of the warp estimated for distortion correction in EPI images while “drop-out” refers to the intensity artefact (for example in temporal lobes) in fMRI EPI images. It is worth noting that we weren’t looking for these values to improve, but rather to achieve similar levels of warping/dropout despite the reduced time spent on shimming.

- “Warping extent”: Figure 1.A shows that the distortion correction estimated for EPI images was not substantially affected by the shimming change (the histograms show a very slight reduction in distortion with the latter shimming method).
- “Drop-out”: We defined dropout regions as being brain regions where intensity (averaged across subjects) falls to less than 20% of the global mean intensity. Figure 1 (panels B and C) shows the mean signal drop-out (focused on the temporal lobes) for 100 subjects before and after the shimming change, with only minor differences apparent. There were no significant changes in mean (across timepoints) intensity in dropout regions after correcting for multiple comparisons across space. At a more liberal testing threshold ( $P < 0.01$ , two-tailed t-test, uncorrected for multiple comparisons), there was a small medio-frontal area of change in signal level ( $t_{200} = 3.4$ ); this showed less dropout with the latter (customised) shimming approach as can be seen in Figure 1.D. This is also confirmed with histograms in Figure 1.E, which shows strong similarity of the intensity distributions in rfMRI before and after the change.

#### 2.1.2.5 Protocol Phase 5 - 27/11/2014 to 28/07/2016 - 7421 subjects

7421 datasets from this phase were used for our analyses. The only change from Phase 4 to Phase 5 was to upgrade the multiband software from CMRR<sup>6</sup> to version “R012”, a change that was not expected to have any impact on data acquired with the Biobank protocol.

<sup>5</sup>Time saved with this change was 1 minute 28 seconds.

<sup>6</sup>Center for Magnetic Resonance Research, U. Minn. <https://www.cmrr.umn.edu/multiband/>

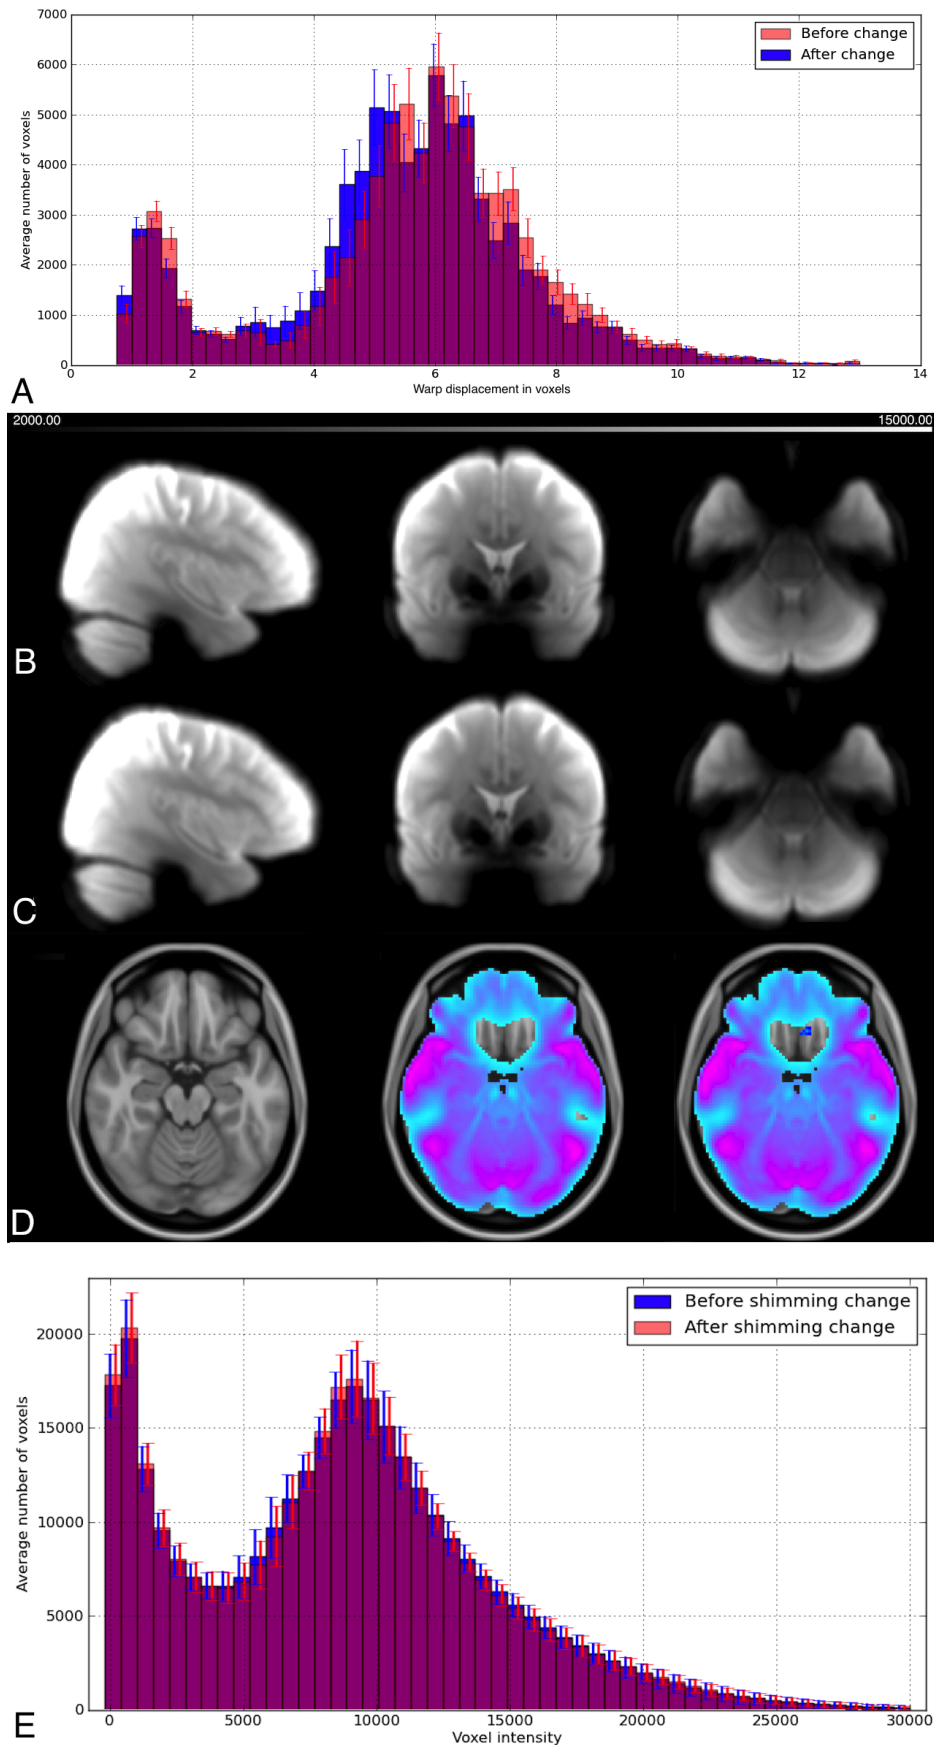

Figure 1: Tests to verify that the change in shimming did not affect the data significantly. *A*: Histogram of the undistortion warp extent before and after the shimming change + standard deviation. *B*: Mean drop-out for 100 subjects before shimming change. *C*: After shimming change. *D left*: MNI152 T1 template. *D middle*: Mean fMRI, original shimming thresholded at 20% global mean. *D right*: Mean fMRI, customised shimming thresholded at 20% global mean. Difference between two shimming methods in dark blue ( $P < 0.01$  uncorrected). *E*: Histogram of the mean intensity of EPI images across 100 subjects (Single Band Reference rfMRI) + standard deviation.

### *2.1.2.6 Protocol Phase 6 - 29/07/2016 to present - 1209 subjects*

This is the current protocol up to the the time of the writing of this paper. There is only one minor change from Phase 5 to Phase 6: the upgrade on the multiband software from CMRR to version “R014”. As in the previous case, this change was not expected to have any impact on data acquired with the Biobank protocol.

### *2.1.3. T1-weighted structural imaging*

T1-weighted structural imaging (“T1”) provides information relating to volumes and morphology of brain tissues and structures. It is also critical for calculations of cross-subject and cross-modality alignments, needed in order to process all other brain modalities. Acquisition details are: 1mm isotropic resolution using a 3D MPRAGE acquisition. The superior-inferior field-of-view is large (256mm), at little cost, in order to include reasonable amounts of neck/mouth, as those areas hold interest for some researchers.

### *2.1.4. T2-weighted FLAIR structural imaging*

T2-weighted FLAIR imaging (“T2 FLAIR”) is a structural technique with contrast dominated by signal decay from interactions between water molecules (T2 relaxation times). T2 images depict alterations to tissue properties typically associated with certain pathology (e.g., white matter lesions). In this modality, signal from fluid (CSF) is suppressed and hence it appears dark (unlike either PD or T2w images).

After early piloting, a standard T2/PD-weighted acquisition was dropped due to a combination of factors such as overall value and timing practicalities. However the T2-weighted FLAIR image is still acquired, which is generally of good quality and which shows strong contrast for white matter hyperintensities.

### *2.1.5. Susceptibility Weighted MRI*

Susceptibility-weighted imaging (“swMRI”) is a structural technique that is sensitive to “magnetic” tissue constituents (magnetic susceptibility). Data from one scan (including phase and magnitude images from two echo times) can be processed in multiple ways to reflect venous vasculature, hemosiderin microbleeds, quantitative susceptibility mapping or aspects of microstructure (e.g., iron, calcium and myelin).

Voxel size for this modality is  $0.8 \times 0.8 \times 3.0$ mm. Anisotropic voxels enhance contrast in the signal magnitude from sources of signal dephasing, such as iron in veins or microbleeds, but are less ideal for other susceptibility-based processing. Ultimately, however, the decision to acquire anisotropic voxels was motivated by the desire for whole brain coverage in the face of very limited scan time (2.5 minutes). To date the magnitude and phase images are saved for each RF coil and echo time separately. This enables flexibility in combination of individual coil images to produce a single phase image. In future the expectation is to combine these on the scanner.

### *2.1.6. Diffusion MRI*

Diffusion-weighted imaging (“dMRI”) measures the ability of water molecules to move within their local tissue environment. Water diffusion is measured along a range of orientations, providing two types of useful information. Local (voxel-wise) estimates of diffusion properties reflect the integrity of microstructural tissue compartments (e.g., diffusion tensor and NODDI measures). Long-range estimates based on tract-tracing (tractography) reflect structural connectivity between pairs of brain regions.

For the two diffusion-weighted shells, 50 diffusion-encoding directions were acquired (with all 100 directions being distinct). The diffusion preparation is a standard (“monopolar”) Stejskal-Tanner pulse sequence. Bipolar encoding was dropped (along the lines of the Human Connectome Project dMRI scanning (Sotiropoulos et al., 2013)) because of the recent advances in post-processing (See Section 2.2.6) that are able to remove the greater image distortions (eddy current distortions) incurred by monopolar encoding. This allowed a reduction in echo time from 112ms



to 92ms. Thanks to the lower T2 decay, there is a substantial increase in SNR, and this change also results in reduction of the TR from 4.06s to 3.6s, providing a 10% reduction in scan time.

Acquisition phase-encoding direction for the dMRI data is AP (Anterior-to-Posterior). In order to generate appropriate fieldmaps to carry out geometric distortion correction for EPI images (See Section 2.2.5), a reverse (PA: Posterior-to-Anterior) phase-encoding dMRI is also acquired. This scan is run between the fMRI and the main dMRI. This way, the derived fieldmap is closer “in time” to both fMRI and dMRI (reducing movement-related problems).

### 2.1.7. Resting-state Functional MRI

Resting-state functional MRI (“rfMRI”) measures changes in blood oxygenation associated with intrinsic brain activity (i.e., in the absence of an explicit task or sensory stimulus). It can generate valuable estimations of the apparent connectivity between pairs of brain regions, as reflected in the presence of spontaneous co-fluctuations in signal (i.e., the appearance of a connection based on co-activity, as opposed to a structural tract from dMRI).

As implemented in the CMRR multiband acquisition (Moeller et al., 2010), a separate “single-band reference scan” (SBRef) is acquired. This has the same geometry (including EPI distortion) as the timeseries data, but is not part of a low-TR timeseries, and hence, without the corresponding T1 saturation effects, has higher between-tissue contrast; this is used as the reference scan in head motion correction and alignment to other modalities. In cases where the SBRef image is missing, the alignments use an average image generated from the first 5 volumes from the fMRI timeseries and selecting the one that correlates most highly with the others (after co-alignment). This procedure is similar to the selection of the best b=0 image described in section 2.2.5.

During resting-state scans, subjects are instructed to keep their eyes fixated on a crosshair, relax and “think of nothing in particular”.

### 2.1.8. Task Functional MRI

Task functional MRI (“tfMRI”) uses the same measurement technique as resting-state fMRI, while the subject performs a particular task or experiences a sensory stimulus. It provides information related to the strength and location of response to the specific task (or a specific component of a more complex cognitive process).

A single-band reference scan is also acquired in this sequence (unless it is missing, in which case, it is automatically generated). The task used is the Hariri faces/shapes “emotion” task (Hariri et al., 2002; Barch et al., 2013), as implemented in the HCP, but with shorter overall duration and hence fewer total stimulus block repeats. The participants are presented with blocks of trials and asked to decide either which of two faces presented on the bottom of the screen match the face at the top of the screen, or which of two shapes presented at the bottom of the screen match the shape at the top of the screen. The faces have either angry or fearful expressions. This task was chosen to engage a range of high-level cognitive systems.

The ePrime script that controls the video presented to the participant is derived from the one used by the HCP, and is available online<sup>7</sup>.

## 2.2. Automated processing pipelines

All processing was performed on a dedicated cluster composed of CPU servers (typical speed 2.66 GHz per core, average RAM 10 GB per core) as well as GPU servers for the GPU-optimised parts of the processing pipeline (Nvidia Tesla K40/K80 GPUs for processing with Cuda 5.5<sup>8</sup>).

<sup>7</sup><http://biobank.ctsu.ox.ac.uk/crystal/refer.cgi?id=1462> .

<sup>8</sup>GPU processing is used for the FSL eddy and bedpostx tools, with further tools being ported to GPU in the future

Image reconstruction from k-space is performed on the scanner using standard Siemens reconstructions, except for multiband EPI (reconstructed using custom CMRR code). Partial bias field correction is performed via the on-scanner “pre-scan normalise” option. No on-scanner gradient distortion correction is applied. After reconstruction and on-scanner preprocessing, image data is received (in DICOM format) by the pipeline. A general view of the processing pipeline can be seen in Figure 7 of the supplementary material.

The source code for the pipeline can be found online<sup>9</sup>.

### 2.2.1. Initial preprocessing steps

Data conversion: DICOM to NIFTI

All DICOM image files are converted to NIFTI format using `dcm2niix` (Li et al., 2016). This tool also generates the diffusion-encoding b-value and b-vector files, as well as a JSON file for each NIFTI image with important meta-information such as: acquisition date and time, echo time, repetition time, effective echo spacing, encoding direction, magnetic field strength, flip angle and normalisation by scanner.

Image data is available from UK Biobank in both DICOM and (separately) NIFTI formats. Both forms include the raw (non-processed) data, the only differences being that the NIFTI-version T1/T2 structural images are defaced for subject anonymity (as described below), and the full multi-coil (pre-combination) swMRI data is only available in the DICOM downloads. Researchers may download individual zipfiles corresponding to one modality from one subject for one data format (DICOM or NIFTI).

The NIFTI versions are the recommended option, partly because for each modality a small number of simply and consistently named images are provided (e.g., “T1”, “rfMRI”), as opposed to thousands of separate DICOM files (with complex naming conventions dictated by the scanner). Also, the NIFTI downloads, while overall only being 40% larger than pure-raw DICOM downloads, include not just the raw images, but also images output by the processing pipeline, for example after gradient distortion correction (for all modalities), and correction for eddy currents and head motion (dMRI data), and artefact removal (rfMRI data).

Data organization

The directory tree structure of the processed data is available online<sup>10</sup>.

For each subject, the raw and processed imaging data files are automatically organised into subfolders according to the different modalities, with a uniform naming scheme for files and directories. To achieve this, we need to check all the files that have been converted from DICOM to NIFTI, find the ones that correspond to each modality (by matching a set of naming patterns), sort out the possible problems with the number of files found per modality (missing files or having more files than expected) and finally, renaming the result according to the naming scheme. To resolve problems regarding the number of found files, we developed the logical rules defined in Algorithms 1 to 4 in the Supplementary Material.

This file organisation can be converted to BIDS format (Gorgolewski et al., 2016) with a conversion script included in the pipeline.

After the main file organisation, a basic Quality Control (QC) tool is used to check if every raw dataset in each modality has the correct dimensions. When raw data has the wrong dimensions, is corrupted, missing or otherwise unusable, it is moved into a sub folder (inside the given modality’s folder), and not processed any further (apart from defacing applied to the raw T1 and T2 FLAIR).

This “unusable” data is included in the NIFTI packages in Biobank database because some researchers may be

---

<sup>9</sup>[https://git.fmrib.ox.ac.uk/falmagro/UK\\_biobank\\_pipeline\\_v\\_1](https://git.fmrib.ox.ac.uk/falmagro/UK_biobank_pipeline_v_1)

<sup>10</sup><http://www.fmrib.ox.ac.uk/ukbiobank>

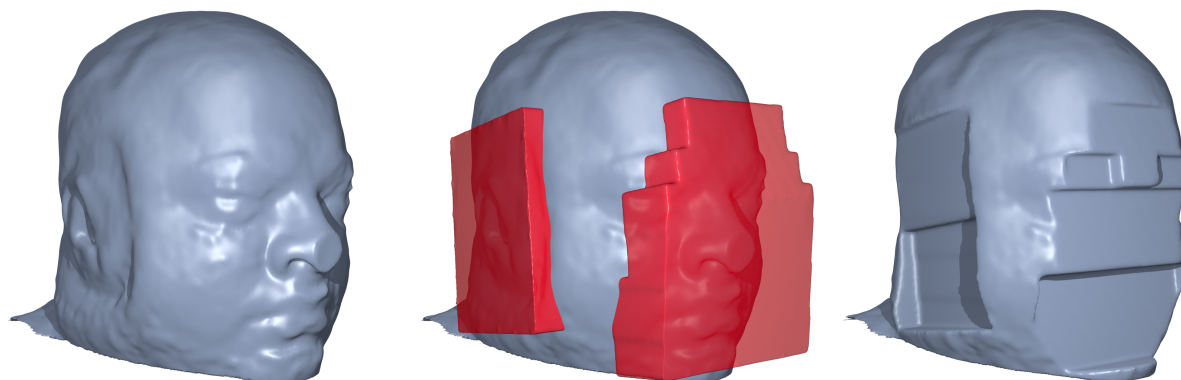

Figure 2: Example of defacing. *Left*: Original T1 volume (non-Biobank subject). *Center*: Applying defacing masks. *Right*: Defaced T1 volume.

interested in working with it, for example, to develop methods for detecting or even possibly correcting such data.

In the case of unusable T1 data, the raw imaging data for all other modalities is deemed unusable (because the pipeline cannot function without a usable T1). However, as with the T1 data, all such raw data is still available for NIFTI download, but without any processing applied.

In the case of the early incompatible dMRI and T2 FLAIR data from Phase 2 (Section 2.1.2), these are not passed to the image processing pipeline, but the raw data are moved to a separate folder, and still made available for download. For example, some researchers may wish to investigate the possibility of developing analyses which can handle these protocol incompatibilities.

### Image anonymisation

To protect study participant anonymity, the header data that is received by the pipeline is completely stripped of all sensitive information such as name and any other information that could be used to identify the participant.

Furthermore, the high resolution structural images (T1 and T2) are automatically “defaced” by masking out extracranial voxels in the face and ear regions. This is accomplished by estimating a linear transformation between the original data and a standard co-ordinate system (an expanded MNI152 template space)<sup>11</sup>, and back-projecting a standard-space mask of the face and ear regions into the native data. This process is depicted in Figure 2. To ensure that this process did not unduly remove within-brain voxels, we calculated the overlap between non-defaced brain masks and the defacing masks. Overlap was present in only 0.5% of the subjects<sup>12</sup> and, within these subjects, there was nearly no loss of brain voxels (worst case having 68 overlap voxels out of 1725983 brain voxels).

This defacing procedure is similar to common practice such as in the HCP. The raw, non-defaced DICOM T1 and T2 data is classified as “sensitive” by UK Biobank; researchers requiring raw DICOM non-defaced T1/T2 data should contact UK Biobank to discuss special access requirements.

### Gradient distortion correction

Full 3D gradient distortion correction (GDC) is not available on the scanner for EPI data (gradient distortions are only corrected within-plane for 2D EPI data), so GDC is applied within the processing pipeline.

GDC is a necessary step, as shown in Figure 3. Tools developed by the FreeSurfer and HCP teams are used for applying the correction, available through the HCP GitHub account<sup>13</sup>. Running these tools also requires a

<sup>11</sup>See section 2.2.2.

<sup>12</sup>33 out of 5821.

<sup>13</sup><https://github.com/Washington-University/Pipelines> .

proprietary data file much faster that describes the gradient nonlinearities<sup>14</sup>.

### 2.2.2. T1 pipeline

T1 structural images are used as a reference for all other modalities. Processing performed on these images should avoid any kind of unnecessary smoothing or interpolation. Therefore, all linear and non-linear pipeline transformations are estimated, but not applied until as late as possible in the processing pipeline when all transforms can be combined and applied with a single interpolation.

As can be seen in Figure 8 of the supplementary material, the pipeline runs a GDC, cuts down the field of view (FOV), calculates a registration (linear and then non-linear) to the standard atlas, applies brain extraction, performs defacing and finally segments the brain into different tissues and subcortical structures.

In more detail: the pipeline first applies GDC for the original T1 image as described above. The FOV is then cut down to reduce the amount of non-brain tissue (primarily empty space above the head and tissue below the brain) to improve robustness and accuracy of subsequent registrations. Tools used to achieve this include BET (Brain Extraction Tool [Smith \(2002\)](#)) and FLIRT (FMRIB's Linear Image Registration Tool [Jenkinson and Smith \(2001\)](#); [Jenkinson et al. \(2002\)](#)), in conjunction with the MNI152 "nonlinear 6th generation" standard-space T1 template<sup>15</sup>. This results in a reduced-FOV T1 head image.

The next step is a non-linear registration to MNI152 space using FNIRT<sup>16</sup> (FMRIB's Nonlinear Image Registration Tool [Andersson et al. \(2007b,a\)](#)). This is a critical step in the pipeline, as many subsequent processing steps depend on accurate registration to standard space. We used the 1mm resolution version of MNI152 template as the reference space.

A particular issue for the non-linear registration was the fact that T1 images in UK Biobank have brighter internal carotid arteries than those the in MNI152 template. This affects the non-linear registration procedure, resulting in distortion in the temporal lobes. Hence, we created a custom reference brain mask to exclude this part of the image when estimating the transformation (see Figure 5 of the supplementary material).

All of the transformations estimated above (GDC, linear and non-linear transformations to MNI152) are then combined into one single non-linear transformation, which allows the original T1 to be transformed into MNI152 space (or vice versa) in a single step.

Using the inverse of the MNI152 alignment warp, a standard-space brain mask is transformed into the native T1 space and applied to the T1 image to generate a brain-extracted T1; this brain extraction replaces the earlier brain-extraction output created by running BET (which was needed just for the initial registration stages). Similarly, a defacing mask (defined as a set of boxes removing eyes, nose, mouth and ears) is transformed into T1 space using the linear transformation and applied for anonymisation purposes. Only the linear transformation is used for defacing, as non-linear registration is performed on brain-extracted images, meaning that the warp field in out-of-brain regions is poorly conditioned. This process is shown in Figure 9 of the supplementary material.

Next, tissue-type segmentation is applied using FAST (FMRIB's Automated Segmentation Tool [Zhang et al. \(2001\)](#)). This estimates discrete and probabilistic segmentations for CSF (cerebrospinal fluid), grey matter and white matter. The same tool is also used to generate a fully bias-field-corrected version of the brain-extracted T1.

These data are then used to carry out a SIENAX<sup>17</sup> analysis [Smith et al. \(2002\)](#). The external surface of the skull is estimated from the T1, and used to normalise brain tissue volumes for head size (compared with the MNI152 template). Volumes of different tissue types and total brain volume, both unnormalised and normalised for head

<sup>14</sup>More information about the this file can be found in: <https://github.com/Washington-University/Pipelines/wiki/FAQ>

<sup>15</sup><http://www.bic.mni.mcgill.ca/ServicesAtlases/ICBM152Nlin6> .

<sup>16</sup>Configuration file for optimal registration is distributed with the pipeline code.

<sup>17</sup>Structural Image Evaluation using Normalisation of Atrophy: Cross-sectional.



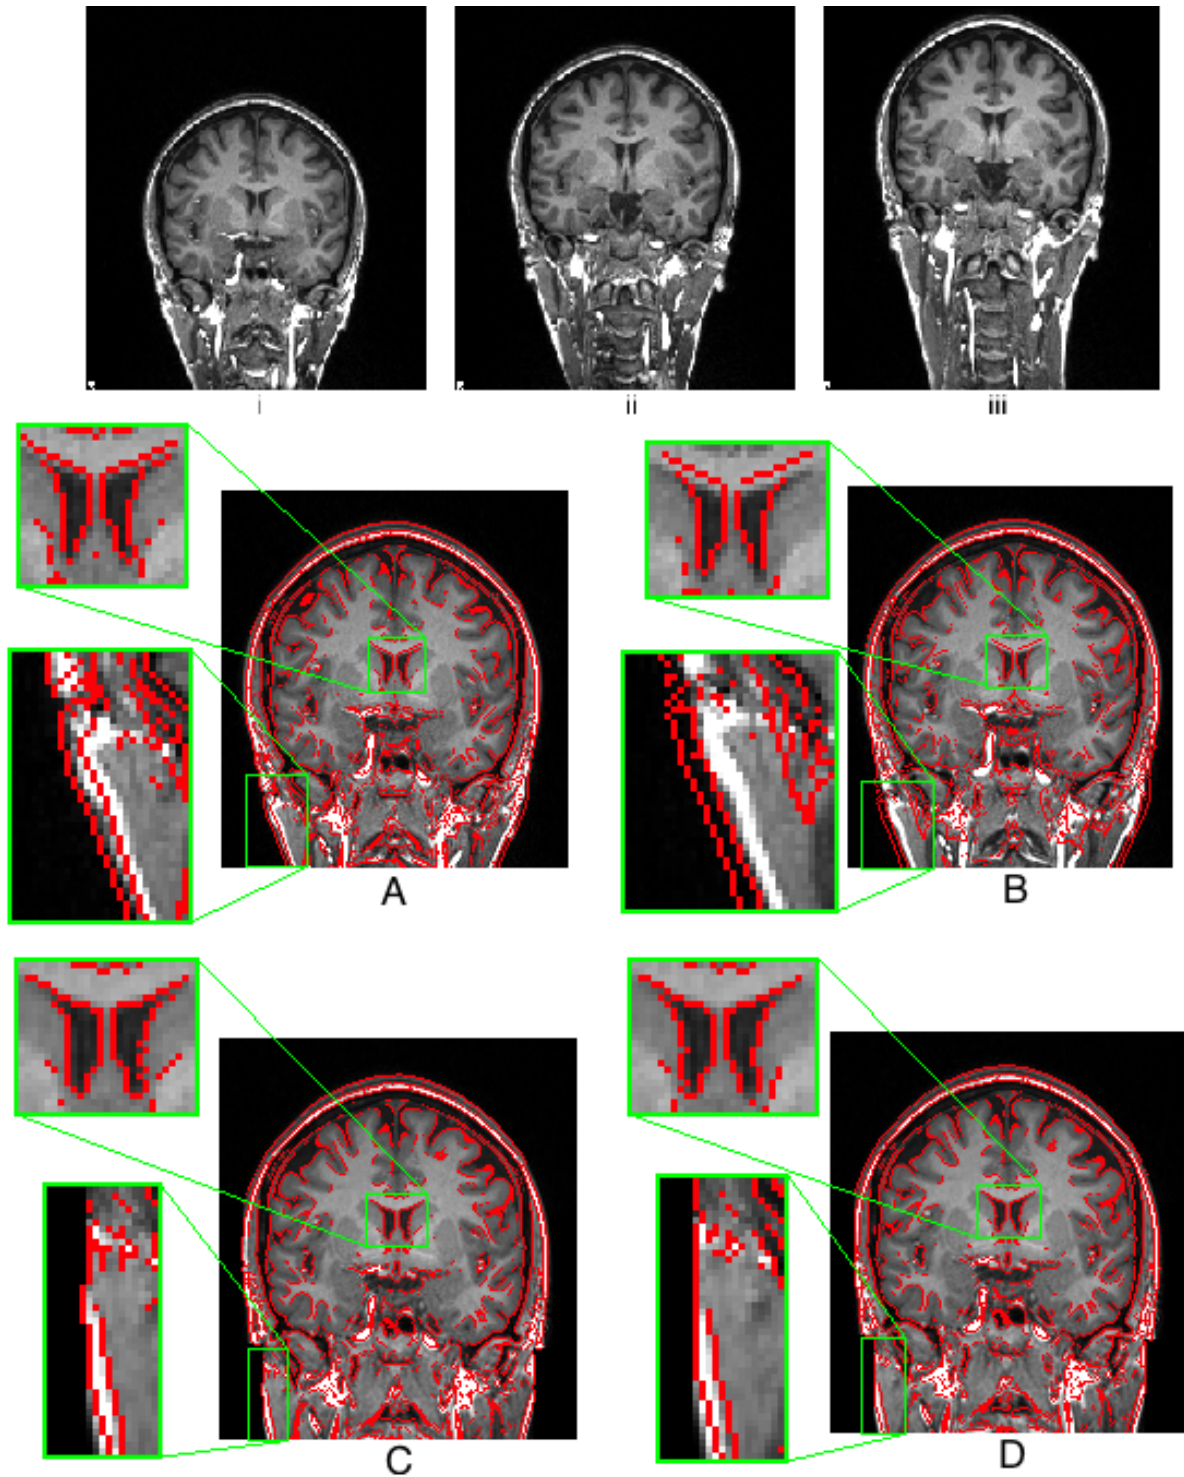

Figure 3: One volunteer was scanned for testing purposes at different positions on the scanning table, depicting the effect of gradient distortion (note the warping in the neck). Correction for gradient distortion (*C* and *D*) substantially improves alignment. *i*: Subject placed at the bottom of the table (Baseline). *ii*: Subject placed in the middle of the table. *iii*: Subject placed at the top of the table. *A*: *ii* (red outline) linearly registered to *i* (background) (Cross correlation: 0.90). *B*: *iii* (red outline) linearly registered to *i* (background) (Cross correlation: 0.83). *C*: *ii* (red outline) linearly registered to *i* (background) after GDC (Cross correlation: 0.98). *D*: *iii* (red outline) linearly registered to *i* (background) after GDC (Cross correlation: 0.96). **Regions highlighting the largest effect (i.e. improved alignment of the ventricle) of the GDC have been zoomed to a 3:1 scale.**



Table 2: Descriptive statistics of WM intensity Inter Quartile Ranges (IQRs) using 3 normalisation methods (78 subjects).

| Normalisation method                                | IQR Typical Subject | Mean IQR | Median IQR | Std IQR |
|-----------------------------------------------------|---------------------|----------|------------|---------|
| T1 not normalised                                   | 0.3274              | 0.3232   | 0.3191     | 0.0418  |
| T1 normalised by scanner                            | 0.0797              | 0.0893   | 0.0872     | 0.0086  |
| T1 normalised by scanner + FAST                     | 0.0508              | 0.0550   | 0.0535     | 0.0058  |
| T2 FLAIR not normalised                             | 0.3106              | 0.3181   | 0.3163     | 0.0365  |
| T2 FLAIR normalised by scanner                      | 0.1429              | 0.1386   | 0.1356     | 0.0181  |
| T2 FLAIR normalised by scanner + FAST from T1       | 0.1116              | 0.1162   | 0.1138     | 0.0136  |
| T2 FLAIR normalised by scanner + FAST from T2 FLAIR | 0.1154              | 0.1144   | 0.1123     | 0.0137  |

size, are then generated.

Subcortical structures (shapes and volumes) are modelled using FIRST (FMRIB’s Integrated Registration and Segmentation Tool [Patenaude et al. \(2011\)](#)). The shape and volume outputs for 15 subcortical structures are generated and stored. A single summary image, with a distinct value coding for each structure is also generated. The volumes of the different structures are saved as IDPs in the UK Biobank database.

### 2.2.3. T2 FLAIR pipeline

The T2 FLAIR processing pipeline is very similar to the T1 pipeline, although we use the non-linear T1-to-MNI152 transformation to transform T2 FLAIR to MNI152 space. For this reason and to assist other combined analyses (e.g. white-matter hyperintensity segmentation), the T2 FLAIR image is first transformed to T1 space as described below.

As shown in Figure 10 of the supplementary material, the original T2 FLAIR image is first corrected for gradient distortions (GDC) and then a rigid-body (6 degrees of freedom) linear registration using FLIRT is applied to transform the corrected T2 FLAIR into corrected T1 space. After this step, the T1 brain and defacing masks are applied to the T2 FLAIR image (see Figure 11 of the supplementary material). Finally, an MNI152-version of T2 FLAIR is also generated using the previously calculated warp from T1 to MNI152.

As a last step, we use the estimated bias field previously calculated by FAST on the T1 image to correct the residual bias field inhomogeneities in the T2 FLAIR image. This approach performs as well as estimating the bias field directly from the T2 FLAIR that have not been removed by the on-scanner ”pre-scan normalise” processing. To validate this approach, we confirmed that the histograms for white matter intensity in 78 (randomly chosen) subjects improved, i.e., the distribution of WM intensity (as measured by the Inter Quartile Range [IQR]) was tightened in a similar way for T1 and T2 FLAIR after using on-scanner bias-field correction and T1’s FAST bias field correction. Figure 4 (panels A and B) shows the intensities for a typical subject, with similar improvement for T1 and T2 FLAIR evident. Figure 4.C shows the different inter-quartile-ranges for all 78 subjects, with the results further summarised in Table 2.

### 2.2.4. swMRI pipeline

The processing pipeline for this modality is shown in Figure 12 of the supplementary material.

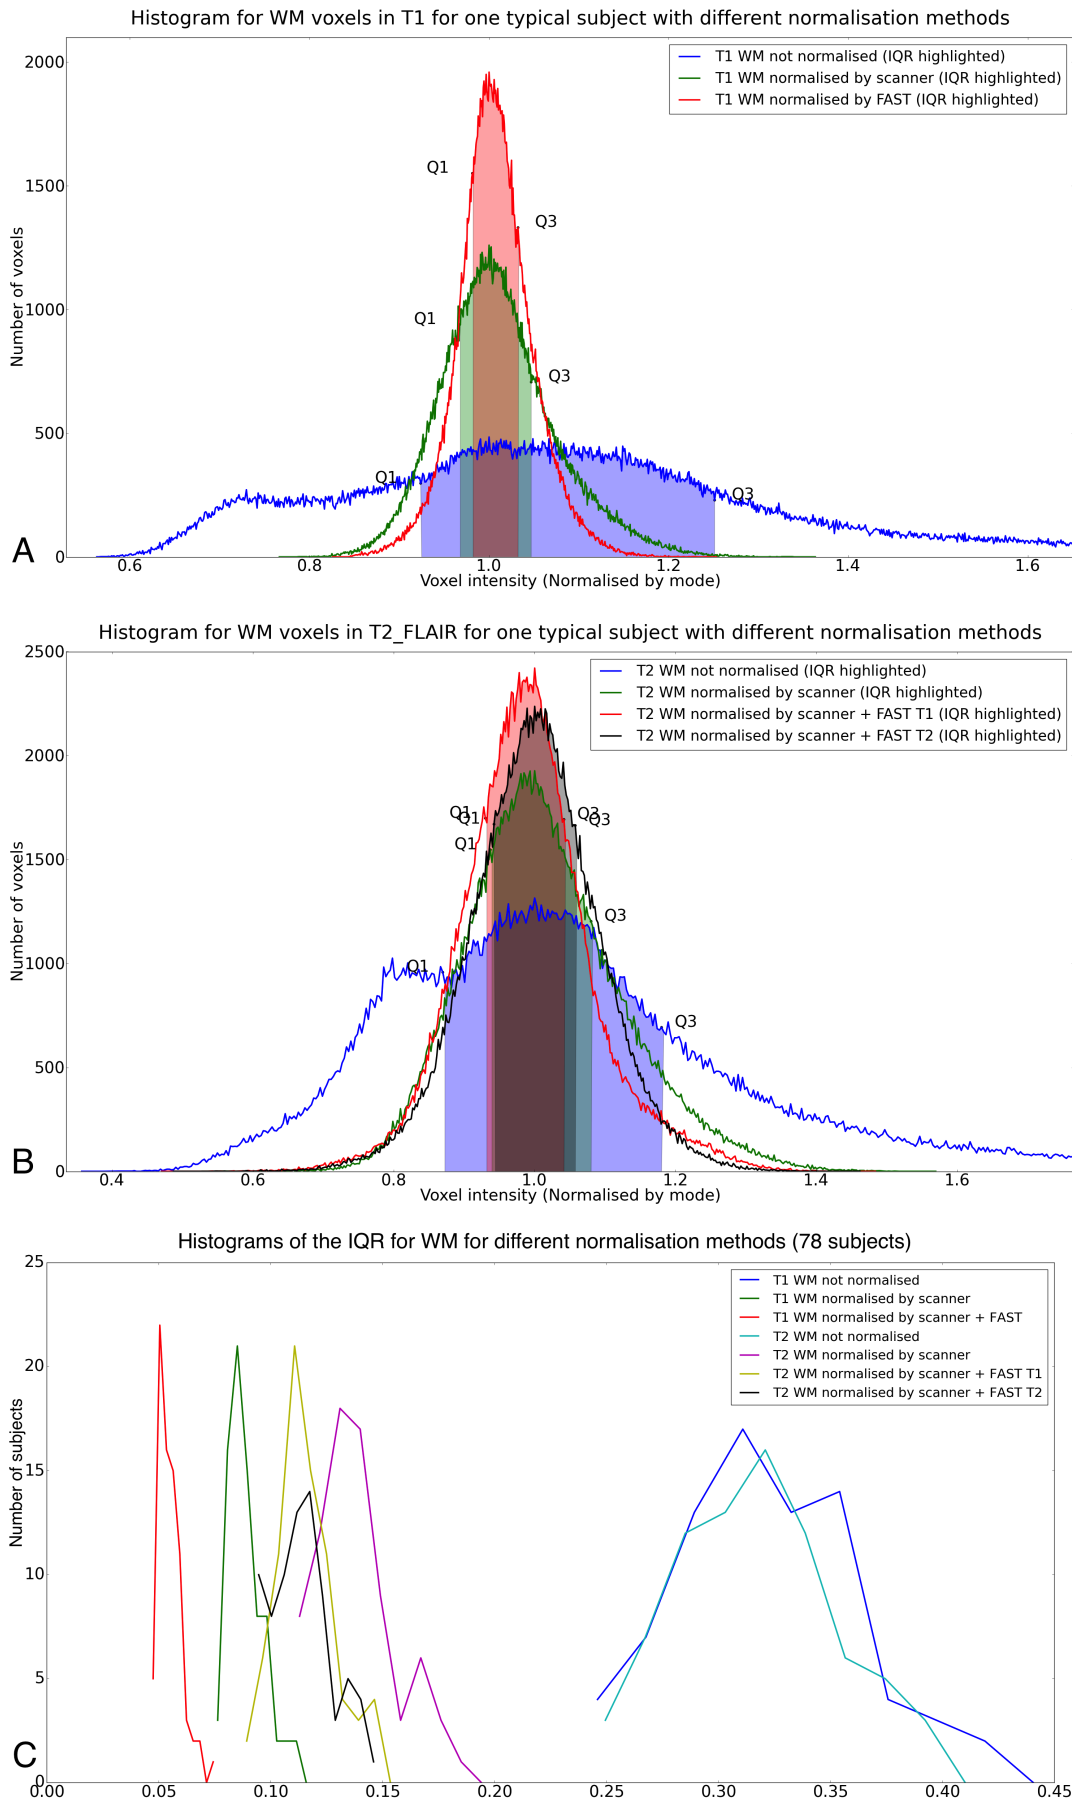

Figure 4: Histogram of WM intensities for a typical subject, showing that use of the bias field estimated from the T1 image can be applied to the T2 FLAIR image with similar improvement in IQR range to the one obtained in T1. Also, the histogram of this method is not very different to the one obtained by applying FAST directly to T2 FLAIR. *A*: T1. *B*: T2 FLAIR. *C*: Distribution of WM intensity Inter Quartile Ranges (IQRs) using different normalization methods in 78 subjects.

Combining phase images across coils requires care due to anomalous phase transitions in regions of focal signal dropout for a given coil. Currently, all coil channels are saved separately to enable combination of phase images in post-processing. Each coil channel phase image is first high-pass filtered to remove low-frequency phase variations (including both coil phase profiles and field distortion from bulk shape). A combined complex image is generated as the sum of the complex data from each coil (unfiltered magnitude and filtered phase), and the final phase image is the phase of the summation of the second echo, since it has greater venous contrast. Careful inspection of a small number of subjects found no anomalous phase transitions from individual channels in the final combined image.

Venograms were calculated using an established reconstruction (Haacke et al., 2004), in which magnitude images are multiplied by a further filtering of the phase data to enhance the appearance of veins. The filtering consists of thresholding the phase image to set the phase to zero in voxels indicating diamagnetic susceptibility, and to take the phase to the fourth power in voxels indicating paramagnetic susceptibility. The chosen power represents a trade-off between venous-tissue contrast and noise in the phase data. This enhances image contrast around veins, which are the source of strongest paramagnetic susceptibility.

Additionally,  $T2^*$  values are calculated from the magnitude data. First, the inverse of  $T2^*$ , termed  $R2^*$ , is calculated from the magnitude image from the two echo times (TE1 and TE2). This is calculated by taking the square of the magnitude image from each individual coil channel, summing across channels, and then taking the square root (typically referred to as “sum-of-squares” combination). The log of the ratio of these two echo time images is calculated, and scaled by the echo time difference, to give the  $R2^*$ .

$T2^*$  is calculated as the inverse of  $R2^*$ . The  $T2^*$  image is then spatially filtered to reduce noise (3x3x1 median filtering followed by limited dilation to fill small holes of missing data) and transformed into the space of the T1 (via linear registration of the bias-field-normalised magnitude image).

### 2.2.5. Fieldmap generation pipeline

Fieldmap images reflect variations in the static magnetic field. These are needed to correct geometric distortions in the phase encoding direction in EPI images (Jezzard and Balaban, 1995).

In the fieldmap generation pipeline (see Figure 13 of the supplementary material) we estimate the fieldmaps from the  $b=0$  images<sup>18</sup> in the dMRI data using the opposing AP - PA phase-encoding acquisitions mentioned in Section 2.1.6. The reasons for doing so, rather than measuring the field using a dual echo-time gradient echo acquisition, are numerous. Firstly, “traditional” fieldmaps (based on dual echo-time gradient-echo images) are not free of problems (Andersson and Skare, 2010). The choice of echo-time difference represents a trade off between wanting a large echo-time difference to get a large difference to calculate the field from, and wanting a small echo-time difference which results in fewer phase-wraps that may be hard to unwrap. Furthermore, such a fieldmap will not automatically be in the same space (position) as the images one wants to correct. Therefore the fieldmap needs to be registered to those images and that is not a trivial task as they are differently distorted. Also, as mentioned in Smith et al. (2013), fieldmaps estimated with reversed encoding direction acquisitions produce an “equivalently good distortion correction accuracy” to that achieved with traditional fieldmaps, while being faster to acquire. This reduction in time, aside from making the acquisition less susceptible to within-scan head motion, saves acquisition time, which is a valuable resource in UK Biobank.

All  $b=0$  dMRI images (interspersed with the high- $b$  images) with opposite phase-encoding direction (AP and PA) are analysed to identify the most suitable pair of AP and PA images<sup>19</sup>. This is achieved by aligning all AP images to each other with a rigid-body registration (6 degrees of freedom) and then calculating the correlation of each  $b=0$  image with all others. The volume that best correlates with all others is selected<sup>20</sup> as the “target”, subject

<sup>18</sup> $b=0$  images (also called B0 or  $b_0$ ) have a B-value below 50.

<sup>19</sup>Differences between  $b=0$  images in each encoding direction can occur due to subject movement.

<sup>20</sup>All steps applied to images in the AP direction are also applied to images in the PA direction.

to the following additional criterion.

As the chosen  $b=0$  image determines the space for later stages (i.e. eddy current-induced distortion correction) we want that space to be as close to the space of the first image with diffusion encoding ( $b>0$ ) as possible. The movement estimation between the  $b=0$  image (no diffusion weighting) images and the two shells with diffusion encoding is not carried out until the end of the eddy current correction, so if the fieldmap is far away from that first dMRI, the estimation movement process will be less optimal. Furthermore, dMRI images are acquired just after the fMRI images so the case for selecting an early  $b=0$  image is stronger<sup>21</sup>. Hence, we apply a selection bias towards the first  $b=0$  image: if the first  $b=0$  image has sufficient quality (correlation of 0.98 or higher) we would select it as the “best  $b=0$  image” (the same selection bias is applied to PA).

This optimal AP/PA pair is then fed into topup<sup>22</sup> (Andersson et al. (2003)) in order to estimate the  $b=0$  image fieldmap and associated dMRI EPI distortions.

The full generation method of the fieldmap magnitude is explained in section 4 of the Supplementary Material. GDC is applied to this magnitude image before registering it to the T1 (which has already been gradient-distortion corrected). The result is linearly aligned to the T1 (using boundary-based-registration [BBR] as the cost function as described in Greve and Fischl (2009)) for later use in unwarping the fMRI data. The resulting transformation is applied to the fieldmap and also inverted to get the dilated structural brain mask in fieldmap (dMRI) space. Finally, the fieldmap image in structural space is brain-masked and converted to radians per second for later use in FEAT for fMRI unwarping.

#### 2.2.6. dMRI pipeline

As can be seen in Figure 15 of the supplementary material, in the first step of this part of the pipeline the dMRI data (AP encoding direction) is corrected for eddy currents and head motion, and has outlier-slices (individual slices in the 4D data) corrected using the eddy tool (Andersson and Sotiropoulos, 2015, 2016; Andersson et al., 2016). This step requires knowing the “best”  $b=0$  image in the AP direction as discussed above. The primary corrections inside eddy need to be done in-plane and applying the GDC before eddy would move data out of plane. Therefore, GDC is applied after eddy to produce a more accurate correction, as explained in Glasser et al. (2013).

The output is fed into two complementary analyses, one based on tract-skeleton (TBSS) processing, and the other based on probabilistic tractography (bedpostx / probtrackx). Both analysis streams then report a range of dMRI-derived measures within different tract regions: A) measures derived from diffusion-tensor modelling, and B) measures derived from microstructural model fitting.

#### Diffusion-Tensor-Image fitting and NODDI

The  $b=1000$  shell (50 directions) is fed into the DTI fitting (Basser et al., 1994) tool DTIFIT, creating DTI outputs such as fractional anisotropy, tensor mode and mean diffusivity.

In addition to the DTI fitting, the full multi shell dMRI data is fed into NODDI (Neurite Orientation Dispersion and Density Imaging) (Zhang et al., 2012) modelling, using the AMICO (Accelerated Microstructure Imaging via Convex Optimization) tool (Daducci et al., 2015). This aims to generate meaningful voxelwise microstructural parameters, including ICVF (intra-cellular volume fraction - an index of white matter neurite density), ISOVF (isotropic or free water volume fraction) and ODI (orientation dispersion index, a measure of within-voxel tract disorganisation).

---

<sup>21</sup>It is worth noting that the fieldmaps will be used to correct both fMRI and dMRI data.

<sup>22</sup>After making sure that the number of slices in the Z direction is a multiple of topup’s sub-sampling level (See <https://fsl.fmrib.ox.ac.uk/fsl/fslwiki/topup/TopupUsersGuide#A--subsamp>), defined in topup configuration file, by removing the appropriate number of slices from the top of the image.

## WM tract skeleton analysis

The DTI Fractional Anisotropy (FA) image is fed into TBSS (Smith et al., 2006), which aligns the FA image onto a standard-space white-matter skeleton, with alignment improved over the original TBSS skeleton-projection methodology through utilisation of a high-dimensional FNIRT-based warping (de Groot et al., 2013). This decision was re-validated along the lines of de Groot et al. (2013) after a thorough comparison of 14 different alignment methods applied to UK Biobank data (see Figure 5). The resulting standard-space warp is applied to all other DTI/NODDI output maps. For each of the DTI/NODDI maps, the skeletonised images are averaged within a set of 48 standard-space tract masks defined by the group of Susumi Mori at Johns Hopkins University Mori et al. (2005) and Wakana et al. (2007), similar to the TBSS processing applied in the ENIGMA project Jahanshad et al. (2013).

## Probabilistic-tractography-based analysis

In addition to the TBSS analyses, the preprocessed dMRI data is also fed into a tractography-based analysis. This begins with within-voxel modelling of multi-fibre tract orientation structure via the bedpostx tool (Bayesian Estimation of Diffusion Parameters Obtained using Sampling Techniques), which implements a model-based spherical deconvolution and estimates up to 3 fibre orientations per voxel. This is followed by probabilistic tractography (with crossing fibre modelling) using probtrackx (Behrens et al., 2003, 2007; Jbabdi et al., 2012; Hernández et al., 2013). The bedpostx outputs are suitable for running tractography from any (voxel or region) seeding; the pipeline has already automatically mapped a set of 27 major tracts using standard-space start/stop ROI masks defined by AutoPtx de Groot et al. (2013). In order to reduce the amount of processing time for those tracts, AutoPtx was modified to reduce the number of seeds per voxel (the relationship between the number of seeds per voxel and processing time is linear) to 0.3 times the number of seeds specified in the original version of AutoPtx. Figure 6 illustrates the process we used to select this factor.

Although eddy and bedpostx outputs are in the space and resolution of the (GDC-unwarped) native diffusion data, the nonlinear transformation between this space and 1mm MNI standard space (as estimated by TBSS above) is used to create tractography results in 1mm standard space. For each tract, and for each DTI/NODDI output image type, we compute the weighted-mean value of the DTI/NODDI parameter within the tract (the weighting being determined by the tractography probabilistic output).

### 2.2.7. Resting fMRI pipeline

This section of the pipeline uses several outputs from the T1 pipeline (T1, brain-extracted T1, linear and non-linear warp of T1 to MNI152 space and binary mask of the white matter in T1 space). See Figure 16 of the supplementary material for the flowchart.

Using this information and a previously calculated GDC warp for the rfMRI data, a configuration file is generated in a format suitable for use by Melodic (Beckmann and Smith, 2004). Melodic is a complete pipeline in itself which here performs EPI unwarping (utilising the fieldmaps as described above), GDC unwarping, motion correction using MC-FLIRT (Jenkinson et al., 2002), grand-mean intensity normalisation of the entire 4D dataset by a single multiplicative factor, and highpass temporal filtering (Gaussian-weighted least-squares straight line fitting, with  $\sigma = 50.0s$ ). To reduce interpolation artefacts, the EPI unwarping, GDC transformation, and motion correction are combined and applied simultaneously to the functional data. The combination of these warps can be seen in Figure 17 of the supplementary material.

Finally, structured artefacts are removed by ICA + FIX processing (independent component analysis followed by FMRIB's ICA-based X-noiseifier (Beckmann and Smith, 2004; Salimi-Khorshidi et al., 2014; Griffanti et al., 2014). FIX was hand-trained on 40 Biobank rfMRI datasets, and leave-one-out testing showed (mean/median) 99.1/100.0% classification accuracy for non-artefact components and 98.1/98.3% accuracy for artefact components. At this point no lowpass temporal or spatial filtering has been applied.



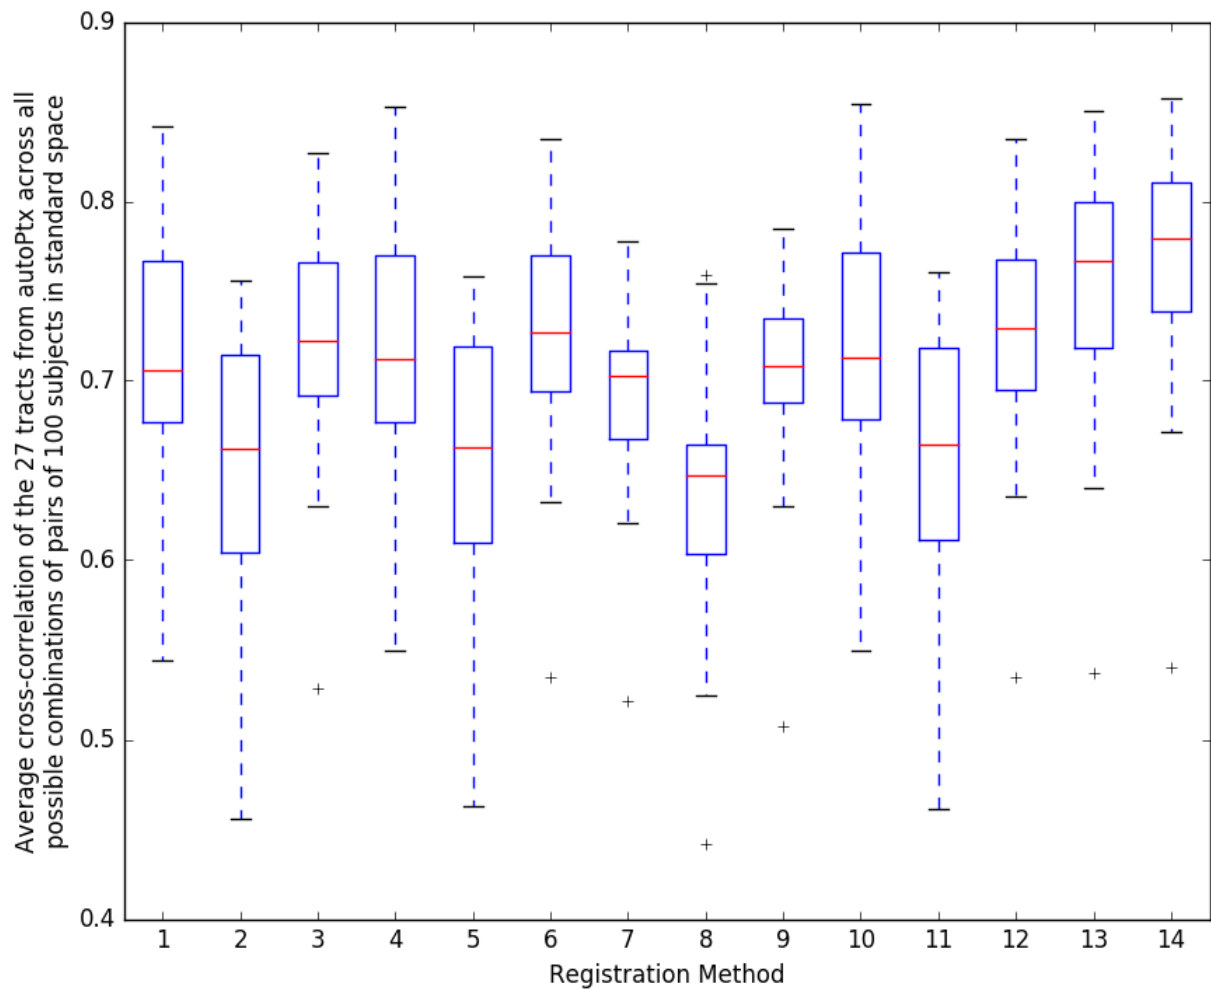

Figure 5: Comparison of 14 different alignment methods of FA to MNI space. We used the same methodology as [de Groot et al. \(2013\)](#). For each registration method, we used its estimated warp field in autoPtx to transform 27 automatically defined tracts into standard space; as discussed in [de Groot et al. \(2013\)](#), judging cross-subject alignment through similarity of tracts can be considered a test of alignment success that is reasonably independent of the images and cost functions used to drive the alignments.

- 1: FA linearly aligned to T1 + T1 non-linearly aligned to MNI.
- 2: FA linearly aligned to T1 + T1's WM non-linearly aligned to MNI's WM.
- 3: FA linearly aligned to T1 + T1's GM non-linearly aligned to MNI's GM.
- 4: Corrected b=0 linearly aligned (BBR) to T1 + T1 non-linearly aligned to MNI.
- 5: Corrected b=0 linearly aligned (BBR) to T1 + T1's WM non-linearly aligned to MNI's WM.
- 6: Corrected b=0 linearly aligned (BBR) to T1 + T1's GM non-linearly aligned to MNI's GM.
- 7: FA non-linearly aligned to T1 + T1 non-linearly aligned to MNI.
- 8: FA non-linearly aligned to T1 + T1's WM non-linearly aligned to MNI's WM.
- 9: FA non-linearly aligned to T1 + T1's GM non-linearly aligned to MNI's GM.
- 10: FA linearly aligned (BBR) to T1 + T1 non-linearly aligned to MNI.
- 11: FA linearly aligned (BBR) to T1 + T1's WM non-linearly aligned to MNI's WM.
- 12: FA linearly aligned (BBR) to T1 + T1's GM non-linearly aligned to MNI's GM.
- 13: FA non-linearly aligned to FA FMRIB58 atlas via an FA study-specific template (created by aligning all the FAs to FA FMRIB58 and then averaging).
- 14: FA non-linearly aligned to FA FMRIB58 atlas using high-dimensional FNIRT-based warping.

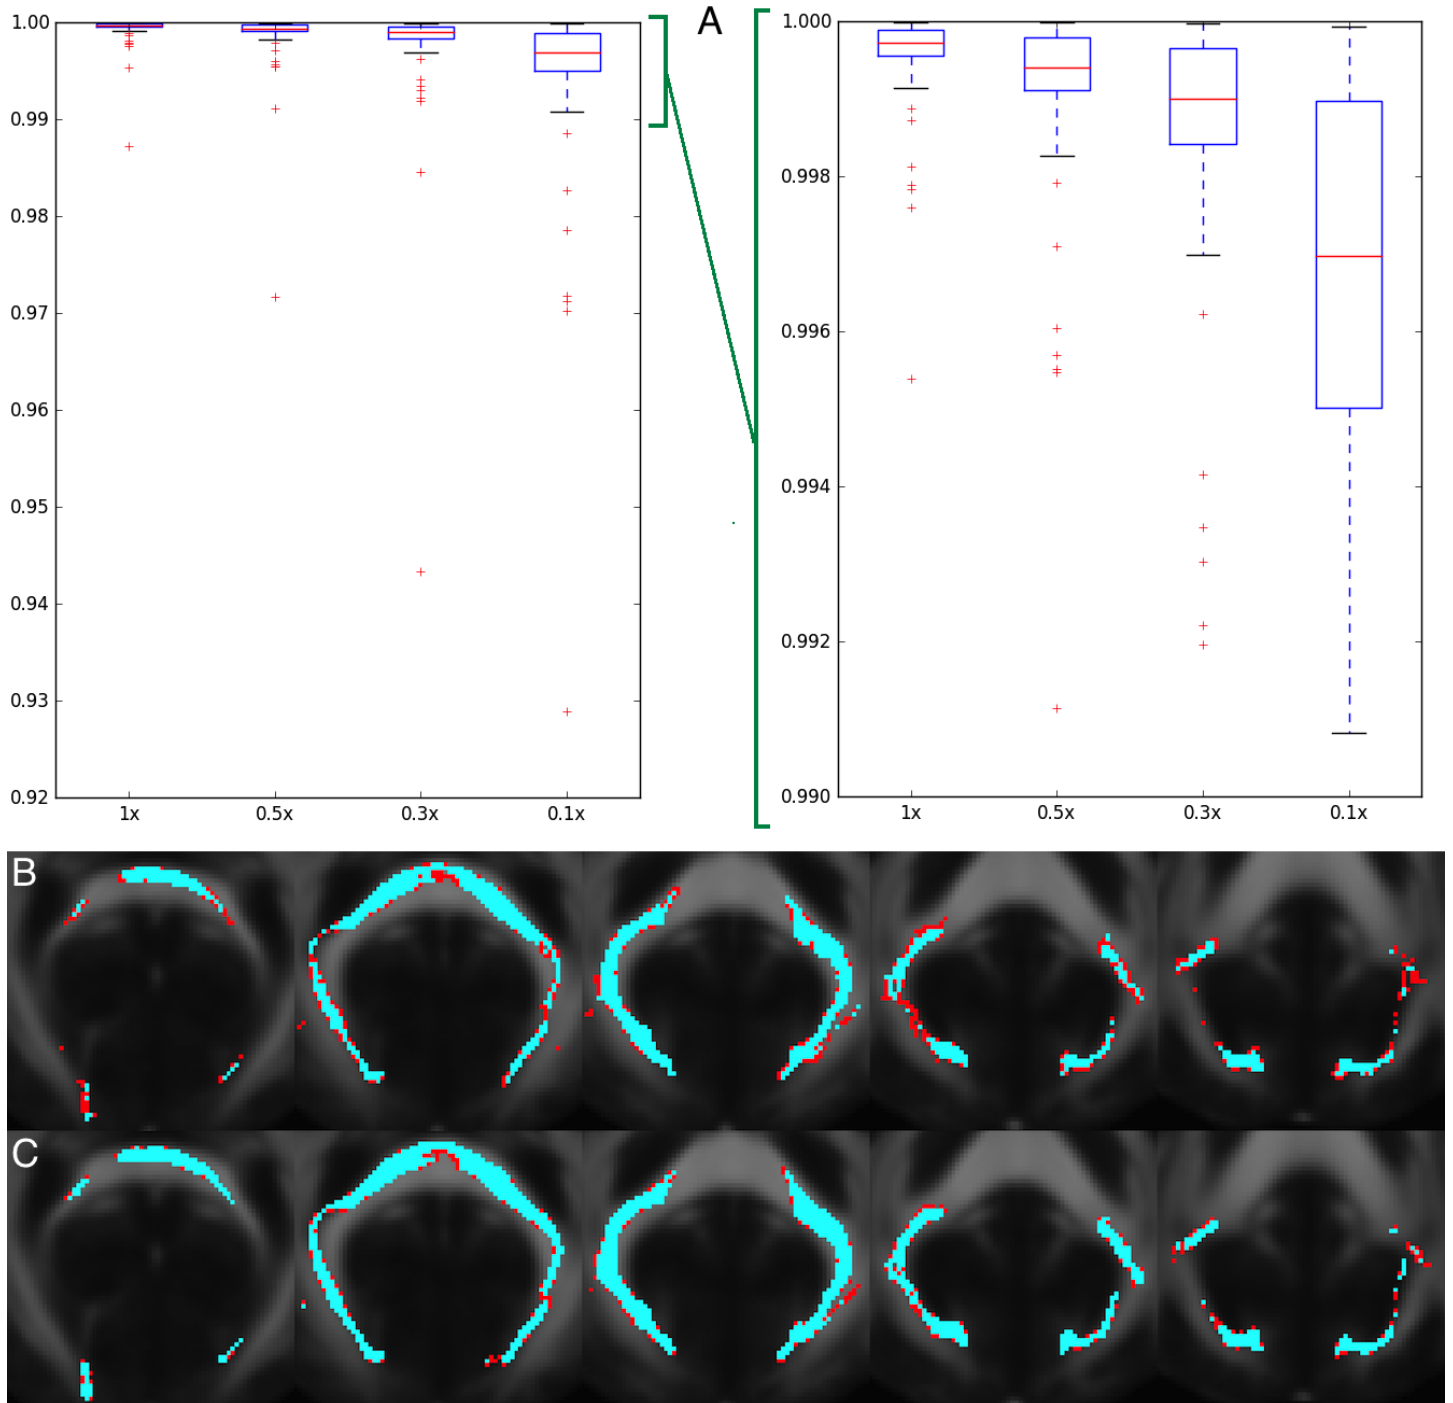

Figure 6: Degree of correlation and similarity of tracts after reducing the number of seeds per voxel in probtrackx. *A*: Average over 27 tracts and 5 subjects of the correlation of 2 different runs of probtrackx is reduced when we reduce the number of seeds per voxel. X axis is the reduction in the number of seeds with respect to the original AutoPtx configuration. Y axis is the average correlation of the pairs of tracts. When we reach 0.1x seeds per voxel, the median correlation drops below 0.999 for some tracts. Right plot is a zoom of left plot. *B*: Worst instance (in terms of correlation) of probtrackx in the forceps major tract with a factor of 0.1x seeds per voxel. The results remain robust even using a reduced number of seeds per voxel. Correlation between the maps for these two runs was **0.929**. The overlap of the 2 runs is shown in blue. The difference is shown in red. FMRIB58 FA atlas is shown in the background. *C*: Same tract (forceps major) from the same subject with a factor of 0.3x seeds per voxel. The results improve by increasing the number of seeds per voxel. Correlation between the maps for these two runs was **0.985**. The overlap of the 2 runs is shown in blue. The difference is shown in red. FMRIB58 FA atlas is shown in the background. **The final decision was to use 0.3x.**

The EPI unwarping is a combined step that includes GDC and alignment to the T1, though the unwarping data is stored in native (unwarped) fMRI space (and the transform to T1 space stored separately). This T1 alignment is carried out by FLIRT, using BBR as the cost function. After the fMRI GDC unwarping, a final FLIRT realignment to T1 space is applied, to take into account any shifts resulting from the GDC unwarping. The previously described transform from T1 space to standard MNI space is utilised when fMRI data is needed in standard space.

To be able to identify RSNs (Resting-State Networks) in individual subjects, we first identify a set of RSNs which are common across the entire group. Therefore, group-average RSN analysis was carried out using 4100 datasets.

First, each subject's preprocessed (as above) timeseries dataset was resampled into standard space, temporally demeaned and had variance normalisation applied according to Beckmann and Smith (2004). Group-PCA was then carried out by MIGP (MELODIC's Incremental Group-PCA) from all subjects. This comprises the top 1200 weighted spatial eigenvectors from a group-averaged PCA (a very close approximation to concatenating all subjects' timeseries and then applying PCA) Smith et al. (2014). The MIGP output was fed into ICA using FSL's MELODIC tool Hyvärinen (1999); Beckmann and Smith (2004), applying spatial-ICA at two different dimensionalities (25 and 100<sup>23</sup>). The dimensionality determines the number of distinct ICA components; a higher number means that distinct regions within the spatial component maps are smaller. The group-ICA spatial maps are available online in the UK Biobank showcase<sup>24</sup>. The sets of ICA maps can be considered as "parcellations" of (cortical and sub-cortical) grey matter, though they lack some properties often assumed for parcellations - for example, ICA maps are not binary masks but contain a continuous range of values; they can overlap each other; and a given map can include multiple spatially separated peaks/regions. Any group-ICA components that are clearly identifiable as artefactual (i.e., not neuronally driven) are discarded for the network modelling described below. A text file is supplied with the publicly available group-ICA maps, listing the group-ICA components kept in the final network modelling.

For a given parcellation (group-ICA decomposition of  $D$  components), the set of ICA spatial maps was mapped onto each subject's rfMRI timeseries data to derive one representative timeseries per ICA component (for these purposes each ICA component is considered as a network "node"). For each subject, these  $D$  timeseries can then be used in network analyses, described below. This is the first stage in a dual-regression analysis Filippini et al. (2009).

The node timeseries are then used to estimate subject-specific network-matrices (also referred to as "netmats" or "parcellated connectomes"). For each subject, the  $D$  node-timeseries were fed into network modelling, discarding the clearly artefactual nodes, leaving  $D_g$  nodes. This results in a  $D_g \times D_g$  matrix of connectivity estimates. Network modelling was carried out using the FSLNets toolbox<sup>25</sup>. Network modelling is applied in two ways:

- Using full normalised temporal correlation between every node time series and every other. This is a common approach and is very simple, but it has various practical and interpretational disadvantages including an inability to differentiate between directly connected nodes and nodes that are only connected via an intermediate node (Smith, 2012), as well as being more corrupted (than partial correlation) by residual shared/global artefacts.
- Using partial temporal correlation between nodes' timeseries. This aims to estimate direct connection strengths better than achieved by full correlation. To slightly improve the estimates of partial correlation coefficients, L2 regularization is applied (setting  $\rho=0.5$  in the Ridge Regression netmats option in

---

<sup>23</sup>The reasoning behind these dimensionalities is:

- 25 results in large scale network decomposition which matches much of the canonical RSN literature (Smith et al., 2009).
- 100 corresponds to a more finely detailed parcellation. We found empirically that it was not useful to go even higher because, with volumetrically aligned data, raising the number of components did not significantly raise the number of non-artefact group level components (as opposed to using surface based analysis where the number of well-aligned small components can be much higher (Smith et al., 2013)

<sup>24</sup><http://biobank.ctsu.ox.ac.uk/crystal/refer.cgi?id=9028> .

<sup>25</sup><http://fsl.fmrib.ox.ac.uk/fsl/fslwiki/FSLNets> .

FSLNets).

Netmat values were Gaussianised from Pearson correlation scores (r-values) into z-statistics, including empirical correction for temporal autocorrelation. Group-average netmats are also available online.

### 2.2.8. Task fMRI pipeline

The same preprocessing and registration was applied as for the rfMRI described above, except that spatial smoothing (using a Gaussian kernel of FWHM 5mm) was applied before the intensity normalisation, and no ICA + FIX artefact removal was performed, both decisions being largely driven by the shorter timeseries in the tfMRI (than the rfMRI) and because of the greater general reliance in tfMRI analysis on voxelwise timeseries modelling (as opposed to multivariate spatiotemporal analyses common in resting-state fMRI).

Pre-processing and task-induced activation modelling was carried out using FEAT (fMRI Expert Analysis Tool); time-series statistical analysis was carried out using FILM with local autocorrelation correction [Woolrich et al. \(2001\)](#). The timings of the blocks of the two task conditions (shapes and faces) are defined in 2 text files. 5 activation contrasts were defined (Shapes, Faces, Shapes+Faces, Shapes-Faces, Faces-Shapes), and an F-contrast also applied across Shapes and Faces.

The 3 contrasts of most interest are: 1 (Shapes), 2 (Faces) and 5 (Faces-Shapes), with the last of those being of particular interest with respect to amygdala activation. Group-average activation maps were derived from analysis across all subjects, and used to define ROIs for generating tfMRI IDPs. Four ROIs were derived; 1 (Shapes group-level fixed-effect z-statistic, thresholded at  $Z > 120$ <sup>26</sup>); 2 (Faces group-level fixed-effect z-statistic, thresholded at  $Z > 120$ ); 5 (Faces-Shapes group-level fixed-effect z-statistic, thresholded at  $Z > 120$ ); 5a (Faces-Shapes group-level fixed-effect z-statistic, thresholded at  $Z > 120$ , and further masked by an amygdala-specific mask). The group-average activation maps and ROIs are available online in the UK Biobank showcase mentioned above.

The Featquery tool was used to extract summary statistics for these 4 contrast/mask combinations, for both activation effect size (expressed as a % signal change relative to the overall-image-mean baseline level) and statistical effect size (z-statistic), with each of these summarised across the relevant ROI in two ways - median across ROI voxels and 90th percentile across ROI voxels.

Display of the task video and logging of participant responses is carried out by ePrime software, which provides several response log files from each subject. These are not used in the above analyses (as the timings of the task blocks are fixed and already known, and the correctness of subject responses are not used in the above analyses), but are available in the UK Biobank database.

### 2.3. IDP generation - summary

To enhance the value of UK Biobank as an important resource for researchers (particularly those not already expert in neuroimaging), a set of Imaging Derived Phenotypes (IDPs) is being generated. These numerical outputs are designed such that each different IDP aims to describe one single objective and meaningful feature in the brain imaging data. They range from simple gross measures, such as total brain volume, to very specific detailed measures, such as average functional connectivity between two specific brain regions. The goal is for IDPs to be useful summary measures derived from the imaging data, that can be used in analyses to relate to other non-imaging variables in UK Biobank, such as health outcome measures. Each IDP is presented as a separate data field within the UK Biobank showcase<sup>27</sup> (except for the rfMRI netmats and node amplitudes, which are saved en masse within “bulk” variables in the database).

---

<sup>26</sup>Both mixed-effects and fixed-effects generate huge z-statistics with this many subjects, so we are choosing here to simply work with the “average” activation given by using fixed-effects.

<sup>27</sup><http://www.fmrib.ox.ac.uk/datasets/ukbiobank/nnpaper/IDPinfo.txt> .

From the T1 structural image, several global volume measures from SIENAX are reported as distinct IDPs, both normalised for overall head size as well as not normalised: total brain (grey + white matter) volume; total white matter volume, total grey matter volume, ventricular (non-peripheral) CSF (cerebrospinal fluid) volume; peripheral cortical grey matter volume. The overall volumetric head-size scaling factor is also recorded as an IDP. Several subcortical structures' volumes from FIRST segmentation (not normalised for brain/head size, although that normalisation can be easily done, as the total brain volume is an IDP) are also reported, in general with separate IDPs for left and right, such as left thalamus and right thalamus. Total volume of grey matter within 139 GM ROIs<sup>28</sup> and total volume of white matter hyperintensities (WMHs) calculated with BIANCA (Griffanti et al., 2016) are also included as IDPs.

From the swMRI data, a T2\* image is estimated. The median (across ROI voxels) T2\* value is then estimated as a separate IDP for each of the subcortical structure ROIs (left thalamus, right caudate, etc.) obtained from the T1.

Spatially-specific IDPs related to the dMRI data are derived in two different ways, as mentioned in section 2.2.6. All diffusion tensor image (DTI) measures (such as FA) and microstructural NODDI measures are summarised as averages in specific areas/tracts. In the first set of measurements, the diffusion data is aligned to a white-matter tract skeleton, and the DTI/NODDI measures averaged within 48 distinct tract ROIs defined using the Johns Hopkins University tract atlas as in Section 2.2.6. In the second set of measurements, probabilistic tractography is run using a set of standard space seed/termination masks, and DTI/NODDI measures averaged within 27 distinct tracts' maps.

From the rfMRI data, the group-average data was “parcellated” into areas at two different levels of detail ( $D=25$  parcels spanning the brain and, separately,  $D=100$ ). As described in section 2.2.7, these parcellations were then mapped onto individual subjects' datasets, and clearly-artefactual parcels discarded, resulting in  $D_g \times D_g$  network models (matrices) for each subject. As the matrices are symmetric, only values above the diagonal are kept, and unwrapped into a single row of  $D_g \times (D_g-1) / 2$  values per subject. This results in one “compound” IDP (containing all network matrix values for a given subject) for each original dimensionality ( $D=25$  and 100) and for each network matrix estimation method (full correlation and partial correlation).

From the tfMRI data, activation is estimated for the 3 primary “contrasts” of interest (as described in section 2.2.8). For these contrasts (“Shapes”, “Faces” and “Faces-Shapes”), a population-average activation was estimated and used to define a region-of-interest (ROI) within which to estimate subject-specific activation IDPs. Across voxels in the relevant ROI, the median and 90th percentile subject-specific activation are estimated for each contrast, reporting both activation effect size (expressed as a % signal change relative to the overall-image-mean baseline level) and statistical effect size (z-statistic). The third contrast (“Faces-Shapes”) was also evaluated within an additional group-defined ROI - the intersection of the original group-average ROI for this contrast, and an amygdala mask derived from the Harvard-Oxford structural atlas.

A comprehensive list of all IDPs is available in Section 2 of the supplementary material.

#### 2.4. Automated Quality Control

We have developed an automated Quality Control tool to identify images with problems either in their acquisition or in later processing steps. This uses machine learning methods with supervised learning. We first categorise the different problems that we may find in the images and manually classify many datasets accordingly. We then generate a set of QC features aiming to characterise those images. Finally, we feed that information into a supervised learning classifier. With this approach we aim to have a classifier capable of detecting problematic images with acceptable accuracy. To date we have concentrated just on automated QC for the T1 images, as the

---

<sup>28</sup>The ROIs are defined by combination of parcellations from several atlases: Harvard-Oxford cortical and subcortical atlases, and Diedrichsen cerebellar atlas



Table 3: Classification of problems / imperfections for T1

| Problem code                                | Imperfection code                       |
|---------------------------------------------|-----------------------------------------|
| 0 = No problem                              |                                         |
| 1 = Multiple / Unknown problems             | 1 = Multiple / Unknown imperfections    |
| 2 = Missing or incomplete modality          | 2 = Bad head movement                   |
| 3 = Bad FOV                                 | 3 = Movement-related ringing / blurring |
| 4 = Bad registration: bad head motion       | 4 = Bias field / contrast problem       |
| 5 = Bad registration: structurally atypical | 5 = Structurally atypical               |
| 6 = Bad registration: unknown reason        |                                         |

**Incomplete** = The expected number of images or any of the dimensions (including the temporal dimension) is incorrect.

**Structurally atypical:** The subject is anatomically atypical. This may be due to a pathology although there was no clinical assessment to confirm this. The problem may be so severe that registration is strongly affected (and thus, the image is deemed unusable).

entire processing pipeline depends on having a usable T1.

#### 2.4.1. QC categories

Table 3 shows the categories for QC that were developed to classify issues that may be found in T1 images. This list was compiled as new issues were identified (through manual inspection) in the data, and is not intended to cover every possible problem in any MR image, but rather to cover all of the problems that we have observed to date in the Biobank data set. For this study, we define a “problem” as any issue that makes subsequent processing steps impossible or unreliable, while an “imperfection” is an issue which must be noted, but does not necessarily impede further processing. Some issues (e.g., bad head motion) appear in both categories (“problem” and the less serious “imperfection”), where the distinction is to be made on the basis of the seriousness of the image artefacts. Table 2 in the supplementary material shows a similar table for all modalities.

#### 2.4.2. QC features

We developed a set of 190 features to find issues in T1 structural images. A more detailed description can be found in Section 3 of the supplementary material. The features that were developed are focused on characterizing:

- Discrepancy between the T1 (after alignment into MNI standard space) and the MNI template.
- Signal-to-noise ratio.
- Total brain volume and segmented tissue volumes.
- Subcortical structures, volumes.
- Asymmetry between the subcortical structures.
- Global brain asymmetry.
- Normalised intensity of the subcortical structures.
- Volume of grey matter (Using a different brain extraction method) outside the brain mask.
- Amount of segmented tissue in the border of the brain mask.
- Volume of the edges (derived using Canny filter and excluding certain borders) of each segmented tissue.
- Comparison with different brain extraction tools.
- Intensity in the internal and external border of the brain mask.
- Volume of holes in grey and white matter.
- Magnitude of warp field from the non-linear registration to the MNI template.
- Volume of White Matter Hyperintensities.
- Distance (per lobe) between the border of the brain mask and the border of the MNI template.

### 2.4.3. Automated QC tool

We used the Weka machine learning toolbox (Hall et al., 2009), with 3 separate classifiers' outputs fused together. The ensemble classifier used for the fusion was a voting system that combines the a posteriori probabilities of the different classifiers using the 'Minimum Probability' combination rule (Kuncheva, 2004; Kittler et al., 1998). This rule was chosen<sup>29</sup> among 5 different options based on our goal of reducing the FNR (False Negative Rate: rate of missing "problems") as much as possible without increasing the FPR (False Positive Rate: rate of incorrectly flagging "good" cases as "problems") to impractical levels<sup>30</sup>. The three combined classifiers were:

- Bayes Network classifier (Bouckaert, 2008): This classifier first finds the Bayesian network (as a directed acyclic graph) that best fits the data by using the training dataset to create the network structure (using local score metrics on quality of nodes/edges, running conditional independence tests to find causal structure and performing global score metrics by estimating classification accuracy) and then assigning probabilities to each node using the distribution of the same training dataset; the inference is later performed by using the maximum a posteriori decision rule for the parent node for a feature vector.
- Naive Bayes classifier (John and Langley, 1995): This classifier is a simpler version of the above one in the sense that it assumes strong (naive) independence between the features and therefore does not need to generate a graph structure. The maximum a posteriori decision rule for the parent node is also used here for the inference.
- MetaCost classifier (Domingos, 1999): MetaCost is a meta-classifier that allows the use of different costs for penalising (e.g.) FPR vs FNR. for a certain base classifier. In our case, as the primary goal was to try to reduce the False Negatives (subjects that are actually unusable but were classified as usable) we created a cost matrix that penalised greatly this kind of misclassification. This cost matrix was calculated using a grid search of different parameters and can be seen in Table 1 of the Supplementary Material. The base classifier was another Bayes Network classifier.

Combining classifiers usually tries to compensate for possible overfitting (or lack of fitting) of individual classifiers. The reason for choosing this combination of algorithms was that they allowed us to weigh the importance of type I vs type II errors, besides exhibiting a satisfactory accuracy in earlier stages of the classification (again, with a reduced version of the current training set).

## 3. Results

### 3.1. UK Biobank as a resource

So far, the pipeline has been applied to 10,129 subjects. In November 2015, there was a public release of the imaging datasets and IDPs from the first 5847 subjects (Miller et al., 2016); a new set of 4282 subjects has recently been analysed and has been publicly released in February 2017 (Biobank, 2017). The number of datasets from every modality that were deemed suitable for processing are listed in Table 4.

Expanding on the analyses made in Miller et al. (2016), we have run 8 million univariate correlations between IDPs and non-brain-imaging variables, to illustrate the statistical power of this resource. This analysis (see Figure 7.A) not only shows similar results to the ones presented in Miller et al. (2016), but also that correlations with a P value smaller than  $10^{-100}$  are possible due to the large number of subjects. Figure 7.B demonstrates that the new set of 4282 subjects show very similar characteristics to the first set of 5847 subjects.

<sup>29</sup>By testing on a reduced version of the final training set.

<sup>30</sup>As all the cases flagged as "problems" would need a posterior visual inspection.

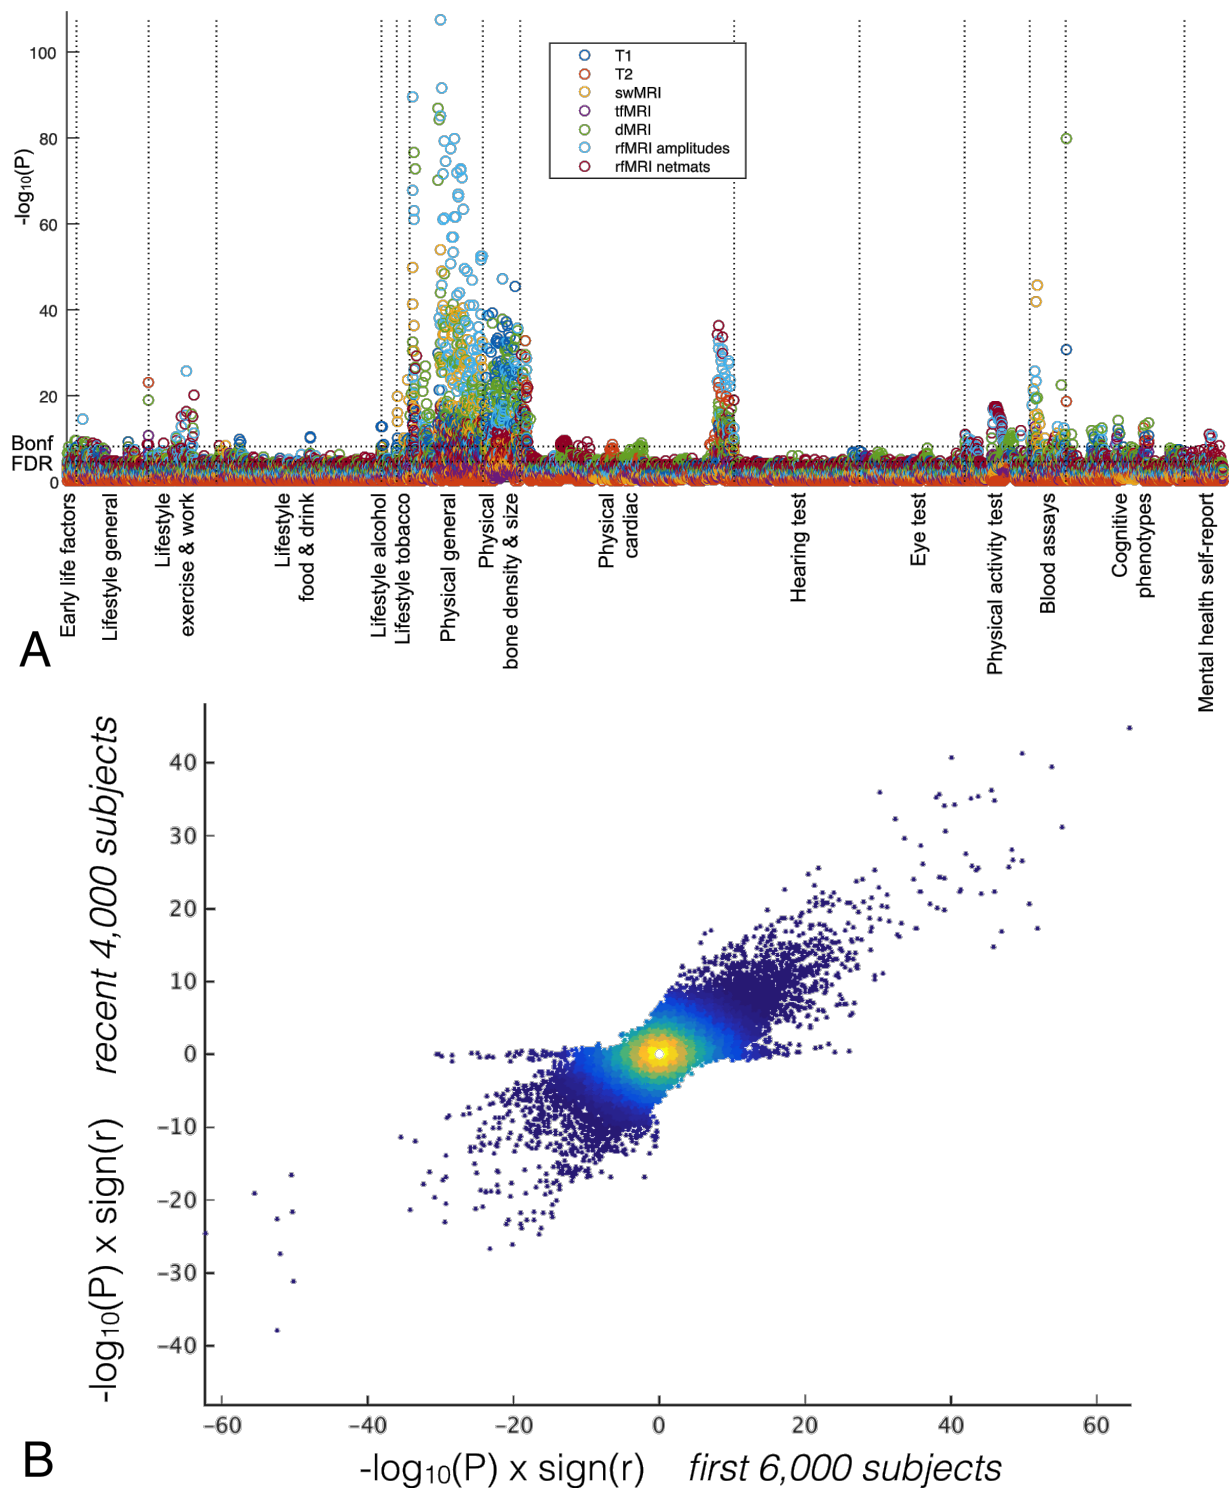

Figure 7: *A*: Manhattan plot summarising the significance of 8 million univariate association tests between IDPs and non-brain-imaging variables in the UK Biobank database from 10,000 subjects. For each non-imaging variable (i.e., each column in the plot), only the strongest association is plotted for each class of IDP, for clarity. Plotted p-values are not corrected for multiple comparisons, but the thresholds for both false-discovery-rate and Bonferroni correction are shown as dotted lines. *B*: High reproducibility ( $r=0.62$ ) of these associations in the original vs. new groups of subjects; each point is a given IDP - non-brain-variable pairing.

Table 4: UK Biobank usable modalities in acquisition order. Total subjects: 10,129.

| Modality | Available | Usable         |
|----------|-----------|----------------|
| T1       | 10,102    | 9,933 (98.06%) |
| rfMRI    | 10,058    | 9,559 (94.37%) |
| tfMRI    | 9,644     | 9,182 (90.65%) |
| T2 FLAIR | 9,781     | 9,046 (89.31%) |
| dMRI     | 9,589     | 8,839 (87.26%) |
| swMRI    | 9,491     | 9,153 (90.36%) |

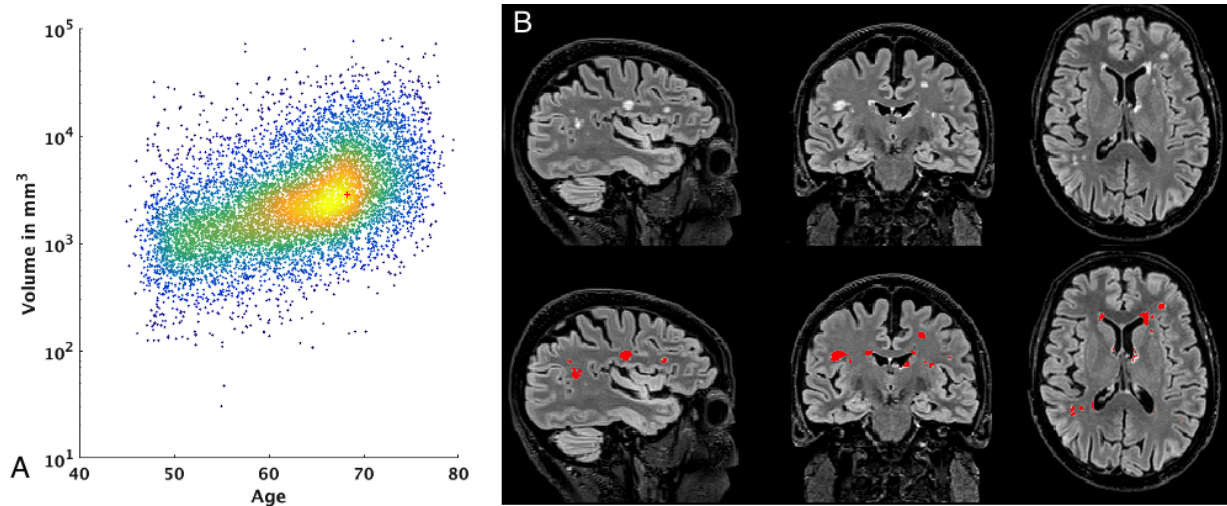

Figure 8: *A*: Relationship between age and total volume of white matter hyperintensities. Red cross shows the subject on the right. *B*: WMH segmentation using BIANCA on one example dataset Age: 68.5 years. Total WMH volume:  $5049 \text{ mm}^3$ .

Figure 8.A shows an example of how useful the IDPs could be. In this case, the volume of White Matter Hyperintensities (WMHs) can be used to explore the relationship between age and WMHs. Figure 8.B shows an example of the WMH segmentation using BIANCA. This metric also correlates with some known health biomarkers, such as systolic and diastolic blood pressure. The positive correlation between total WMH volume and systolic blood pressure (after correcting for usual confounds<sup>31</sup>) has a Bonferroni-corrected significance of  $P < 10^{-20}$ ,  $r = 0.13$ , while the correlation with diastolic blood pressure has a Bonferroni-corrected significance of  $P < 10^{-15}$ ,  $r = 0.11$ . These significant associations are consistent with the literature (Liao et al., 1996; Gunstad et al., 2005).

### 3.2. Performance of the automated QC tool

In order to validate our QC system, image quality for 5822 subjects was manually assessed. Problems were identified in 98 of these subjects, with no problems found in the remaining 5724 subjects. Table 5 shows the performance of the classifier in a stratified<sup>32</sup> 10-fold cross validation.

The majority of problems found in the processing are related to non-linear registration, which may affect the brain extraction. The 98 subjects were deemed unusable due to irreconcilable problems with non-linear registration, in many cases caused by poor data quality (for example, where the T1 is corrupted by bad subject head motion). The QC system we have developed aims to detect problems like this.

The number of false negatives (that is, subjects that are actually unusable but were classified as usable), is low (8 subjects, i.e. 0.13%), though in future work we will aim to reduce this even further. Choosing parameters/thresholds to drive this number of false negatives so low comes at the cost of a much higher false positive

<sup>31</sup>Age, age<sup>2</sup>, sex, age  $\times$  sex, age<sup>2</sup>  $\times$  sex, average head motion during tfMRI, average head motion during rfMRI and head size

<sup>32</sup>The proportion of the classes to classify is maintained in the folds, which is important in unbalanced situations

Table 5: Automated QC tool performance for T1 images

|                            | <b>Positive</b>  | <b>Negative</b>   |                     |
|----------------------------|------------------|-------------------|---------------------|
| <b>Classified Positive</b> | TP: 90           | FP: 747           | P. Precision: 11%   |
| <b>Classified Negative</b> | FN: 8            | TN: 5002          | N. Precision: 99.8% |
|                            | Sensitivity: 92% | Specificity: 87 % | Accuracy: 87%       |

**Positive** = Unusable datasets. **Negative** = Usable datasets.

**Datasets flagged for manual review:** 837 / 5847 (14.31 %)

**Unusable datasets missed:** 8 / 5847 (0.13 %)

rate ( $747 / 5749 = 13\%$ ). Nevertheless, these results guarantee a considerable reduction in the number of subjects in future data sets that will then require manual QC assessment (i.e., manually checking  $837 / 5847 = 14\%$  of subjects instead of 100%).

This automated QC tool was used on the second release of 4282 subjects, significantly reducing the manual checking to approximately 750 subjects, resulting in the detection of 71 unusable datasets.

#### 4. Discussion and future work

The UK Biobank Brain Imaging data and IDPs can be used to create models that describe the population, and in combination with the healthcare outcomes (which will feed into UK Biobank over coming years), be able to identify risk factors and biomarkers for early diagnosis of many diseases. In this paper we provided the first detailed description of the core processing pipeline being developed to process the raw imaging data and generate the IDPs. We also described several investigations necessary to feed into decisions made during the development of the acquisition protocol and the analysis pipeline.

The huge number of subjects makes the need for a completely automated tool evident, including the detection of inadequate datasets or failures in processing. For this reason, the development of an adequate automated QC tool is an absolute necessity, and we have presented here a first approach for automated QC of T1 data.

One of the future challenges will be data analysis and population modelling. The application of new unsupervised learning methods for finding new data-driven IDPs or QC metrics is potentially interesting (Duff et al., 2015). This could also evolve to consider health outcomes as noisy / weak labels (Frénay and Verleysen, 2014) in such a way that the learning process considers their uncertainty and reliability.

Future versions of the processing pipeline will incorporate new functionalities from other sources into the pipeline (such as the HCP, Glasser et al. (2013)). This will include surface generation via Freesurfer (Dale et al., 1999), adding morphometric measures such as cortical thickness or cortical surface area, mapping resting fMRI and dMRI onto the cortical surface, and using Multimodal Surface Matching (Robinson et al., 2014) for surface-based registration. As the resolution, quality and quantity (e.g. number of fMRI timepoints) in UK Biobank data cannot match that in the HCP (with its 4 hours of scanning per subject) each of these steps will involve careful evaluation and potential reworking in the context of our data. For example, projection of the lower-resolution fMRI data onto the cortical surface vertices, including the HCP approach of removing “noise” voxels, will need careful optimisation.

The development of the QC tool allowed us to find problematic steps in the processing pipeline (i.e. non-linear registration to the MNI template). Even though the number of subjects with this problem is not large ( $98/5847 = 1.7\%$ , compared to the 2-13% failure rate for the acquisitions), and we can detect them fairly consistently, improving this step will be a future line of work. Possible improvements may involve a combination of the following:



- Generating a study-specific T1 template and registering subject images to it instead of to the MNI template.
- Improving brain extraction and using the resulting brain mask to guide registration. Possibilities include running FNIRT with much lower degrees of freedom to initialise brain extraction, and/or developing a classifier that works directly on each voxel to classify them as brain/non-brain. See the Appendix for more details on the brain extraction method we have used to date.
- Combining T1+dMRI (and possibly more modalities) in the registration in a more integrated manner; for example, taking advantage of the richer signal within white matter available from the diffusion imaging.

A possible way to improve QC accuracy would be in the development of better features to drive the classification. These new features may be created by finding new heuristics that better describe the problems or by using unsupervised machine learning techniques to model the data, e.g., using ICA-like techniques (Hyvärinen, 1999; Beckmann and Smith, 2004).

In addition, we need the development of metrics to describe the discrepancy between the T1 image (for a given subject) and each of the other modalities (for that same subject), after linear alignment of the other modalities to the T1. Therefore, we are planning to extend the automated QC system to reliably find problems in the acquisition and processing steps for all modalities (not just T1). Again, ICA-like techniques may be useful here, as well as methods based on the Hidden Markov Model (Baker et al., 2014; Vidaurre et al., 2016) to interrogate the network dynamics.

Having a fixed acquisition protocol and a core processing pipeline in UK Biobank is a key feature of this project (Gronenschild et al., 2012; Glatard et al., 2015). Providing one core pipeline that generates both processed data (e.g., with images artefact-cleaned and aligned across modalities and subjects) as well as IDPs will hopefully be valuable to both imaging researchers and non-imaging experts (healthcare researchers, epidemiologists, etc.). Having said that, the intention is not to discourage other imaging researchers from developing their own image processing and IDP generation approaches and software; indeed, UK Biobank encourages all researchers to feed quantitative research outputs back into the central database. Considering the invaluable connection of the outputs from processing the brain imaging data with the rest of UK Biobank resources and NHS records, the possibilities for future research are massive.

**Acknowledgements.** UK Biobank brain imaging and FAA are funded by the UK Medical Research Council and the Wellcome Trust. LG is funded by the NIHR Oxford Biomedical Research Centre and the Monument Trust Discovery Award from Parkinson’s UK. GD is supported by the UK Medical Research Council (MRC) MR/K006673/1. EV is supported by the Engineering and Physical Sciences Research Council (EPSRC) D4TD4D12/HM12.01. The authors gratefully acknowledge funding from the Wellcome Trust UK Strategic Award [098369/Z/12/Z]. PMM thanks the Edmond J. Safra Foundation, Lily Safra, NIHR and the Imperial College Healthcare Trust BRC for personal support. Additional input on methods, processing pipeline and informatics: Eugene Duff, David Flitney, Steve Garratt, John Miller, Duncan Mortimer, Jonathan Price, Gholamreza Salimi-Khorshidi, Anderson Winkler and Alan Young.

## 5. BIBLIOGRAPHY

### References

- Abe, S., Irimia, A., Van Horn, J. D., 2015. Quality Control Considerations for the Effective Integration of Neuroimaging Data. In: *Data Integration in the Life Sciences*. Springer, pp. 195–201.
- Afyouni, S., Nichols, T. E., 2017. Insight and inference for DVARS. *bioRxiv*, 125021.
- Andersson, J. L., Graham, M. S., Zsoldos, E., Sotiropoulos, S. N., 2016. Incorporating outlier detection and replacement into a non-parametric framework for movement and distortion correction of diffusion mr images. *NeuroImage* 141, 556–572.
- Andersson, J. L., Jenkinson, M., Smith, S., 2007a. Non-linear registration aka Spatial normalisation. Internal Technical Report TR07JA2, Oxford Centre for Functional Magnetic Resonance Imaging of the Brain, Department of Clinical Neurology, Oxford University, Oxford, UK, available at [www.fmrib.ox.ac.uk/analysis/techrep](http://www.fmrib.ox.ac.uk/analysis/techrep) for downloading.

- Andersson, J. L., Skare, S., 2010. Image distortion and its correction in diffusion MRI. In: Jones, D. (Ed.), *Diffusion MRI: theory, methods, and applications*. Oxford University Press, Oxford, pp. 285–302.
- Andersson, J. L., Skare, S., Ashburner, J., 2003. How to correct susceptibility distortions in spin-echo echo-planar images: application to diffusion tensor imaging. *Neuroimage* 20 (2), 870–888.
- Andersson, J. L., Smith, S., Jenkinson, M., 2007b. Non-Linear Optimisation. Internal Technical Report TR07JA1, Oxford Centre for Functional Magnetic Resonance Imaging of the Brain, Department of Clinical Neurology, Oxford University, Oxford, UK, available at [www.fmrib.ox.ac.uk/analysis/techrep](http://www.fmrib.ox.ac.uk/analysis/techrep) for downloading.
- Andersson, J. L., Sotiropoulos, S. N., 2015. Non-parametric representation and prediction of single-and multi-shell diffusion-weighted MRI data using Gaussian processes. *NeuroImage* 122, 166–176.
- Andersson, J. L., Sotiropoulos, S. N., 2016. An integrated approach to correction for off-resonance effects and subject movement in diffusion MR imaging. *NeuroImage* 125, 1063–1078.
- Baker, A. P., Brookes, M. J., Rezek, I. A., Smith, S. M., Behrens, T., Smith, P. J. P., Woolrich, M., 2014. Fast transient networks in spontaneous human brain activity. *Elife* 3, e01867.
- Barch, D. M., Burgess, G. C., Harms, M. P., Petersen, S. E., Schlaggar, B. L., Corbetta, M., Glasser, M. F., Curtiss, S., Dixit, S., Feldt, C., et al., 2013. Function in the human connectome: task-fMRI and individual differences in behavior. *Neuroimage* 80, 169–189.
- Basser, P. J., Mattiello, J., LeBihan, D., 1994. Estimation of the effective self-diffusion tensor from the NMR spin echo. *Journal of Magnetic Resonance, Series B* 103 (3), 247–254.
- Beckmann, C., Smith, S., 2004. Probabilistic Independent Component Analysis for Functional Magnetic Resonance Imaging. *IEEE Trans. on Medical Imaging* 23 (2), 137–152.
- Behrens, T., Berg, H. J., Jbabdi, S., Rushworth, M., Woolrich, M., 2007. Probabilistic diffusion tractography with multiple fibre orientations: What can we gain? *Neuroimage* 34 (1), 144–155.
- Behrens, T., Woolrich, M., Jenkinson, M., Johansen-Berg, H., Nunes, R., Clare, S., Matthews, P., Brady, J., Smith, S., 2003. Characterization and propagation of uncertainty in diffusion-weighted MR imaging. *Magnetic resonance in medicine* 50 (5), 1077–1088.
- Bennett, C. M., Miller, M. B., 2010. How reliable are the results from functional magnetic resonance imaging? *Annals of the New York Academy of Sciences* 1191 (1), 133–155.
- Biobank, 2014. Biobank protocol specifications. [http://biobank.ctsu.ox.ac.uk/crystal/docs/bmri\\_V4\\_23092014.pdf](http://biobank.ctsu.ox.ac.uk/crystal/docs/bmri_V4_23092014.pdf), accessed: 2017-02-01.
- Biobank, 2016. Biobank First Public Imaging Release. <http://biobank.ctsu.ox.ac.uk/crystal/label.cgi>, accessed: 2016-01-01.
- Biobank, 2017. New data from brain imaging and on heart attacks and strokes available. <https://www.ukbiobank.ac.uk/2017/02/new-data-from-brain-imaging-and-on-heart-attacks-and-strokes-available/>, accessed: 2016-02-13.
- Bouckaert, R. R., 2008. Bayesian Network Classifiers in Weka. <http://www.cs.waikato.ac.nz/~remco/weka.bn.pdf>, accessed: 2016-09-7.
- Breteler, M. M., Stöcker, T., Pracht, E., Brenner, D., Stirnberg, R., 2014. MRI in the Thineland study: A novel protocol for population neuroimaging. *Alzheimer's & Dementia: The Journal of the Alzheimer's Association* 10 (4), P92.
- CBS, 2016. Qualitative Quality Control Manual. [http://cbs.fas.harvard.edu/usr/mcmains/CBS\\_MRI\\_Qualitative\\_Quality\\_Control\\_Manual.pdf](http://cbs.fas.harvard.edu/usr/mcmains/CBS_MRI_Qualitative_Quality_Control_Manual.pdf), accessed: 2016-04-22.
- Chen, J., Liu, J., Calhoun, V. D., Arias-Vasquez, A., Zwiers, M. P., Gupta, C. N., Franke, B., Turner, J. A., 2014. Exploration of scanning effects in multi-site structural MRI studies. *Journal of neuroscience methods* 230, 37–50.
- Cook, P., Bai, Y., Nedjati-Gilani, S., Seunarine, K., Hall, M., Parker, G., Alexander, D., 2006. Camino: open-source diffusion-MRI reconstruction and processing. In: 14th scientific meeting of the international society for magnetic resonance in medicine. Vol. 2759. Seattle WA, USA, p. 2759.
- Craddock, C., Giavasis, S., Clark, D., Shezhad, Z., Pellman, J., Gorgolewski, C. F., Moodie, C. A., Esteban, O., 2016. PCP: Quality Assessment Protocol. <http://preprocessed-connectomes-project.org/quality-assessment-protocol/>, accessed: 2016-08-20.
- Daducci, A., Canales-Rodríguez, E. J., Zhang, H., Dyrby, T. B., Alexander, D. C., Thiran, J.-P., 2015. Accelerated Microstructure Imaging via Convex Optimization (AMICO) from diffusion MRI data. *NeuroImage* 105, 32–44.
- Dale, A. M., Fischl, B., Sereno, M. I., 1999. Cortical surface-based analysis I: Segmentation and surface reconstruction. *Neuroimage* 9, 179–94.
- de Groot, M., Vernooij, M. W., Klein, S., Ikram, M. A., Vos, F. M., Smith, S., Niessen, W. J., Andersson, J. L., 2013. Improving alignment in tract-based spatial statistics: evaluation and optimization of image registration. *Neuroimage* 76, 400–411.
- Deshmukh, M., Bhosale, U., 2010. Image fusion and image quality assessment of fused images. *International Journal of Image Processing (IJIP)* 4 (5), 484–508.
- Domingos, P., 1999. Metacost: A general method for making classifiers cost-sensitive. In: *Proceedings of the fifth ACM SIGKDD international conference on Knowledge discovery and data mining*. ACM, pp. 155–164.
- Duff, E. P., Vennart, W., Wise, R. G., Howard, M. A., Harris, R. E., Lee, M., Wartolowska, K., Wanigasekera, V., Wilson, F. J., Whitlock, M., et al., 2015. Learning to identify CNS drug action and efficacy using multistudy fmri data. *Science translational medicine* 7 (274), 274ra16–274ra16.
- Esteban, O., Birman, D., Schaer, M., Koyejo, O. O., Poldrack, R. A., Gorgolewski, K. J., 2017. Mriqc: Predicting quality in manual mri assessment protocols using no-reference image quality measures. *bioRxiv*, 111294.
- Esteban, O., Gorgolewski, K. F., A., M. C., Tripplett, W., 2016. MRIQC: Image quality metrics for quality assessment of MRI. <http://mriqc.readthedocs.io/en/latest/>, accessed: 2016-08-20.
- Filippini, N., MacIntosh, B., Hough, M., Goodwin, G., Frisoni, G., Smith, S., Matthews, P., Beckmann, C., Mackay, C., 2009. Distinct Patterns of Brain Activity in Young Carriers of the APOE-ε4 Allele. *Proc Natl Acad Sci USA (PNAS)* 106, 7209–7214.
- Focke, N. K., Helms, G., Kaspar, S., Diederich, C., Tóth, V., Dechent, P., Mohr, A., Paulus, W., 2011. Multi-site voxel-based morphometry—not quite there yet. *Neuroimage* 56 (3), 1164–1170.
- Frénay, B., Verleysen, M., 2014. Classification in the presence of label noise: a survey. *IEEE transactions on neural networks and learning systems* 25 (5), 845–869.
- Friedman, L., Glover, G. H., 2006. Report on a multicenter fMRI quality assurance protocol. *Journal of Magnetic Resonance Imaging* 23 (6), 827–839.
- Glasser, M. F., Sotiropoulos, S. N., Wilson, J. A., Coalson, T. S., Fischl, B., Andersson, J. L., Xu, J., Jbabdi, S., Webster, M., Polimeni, J. R., Van Essen, D. C., Jenkinson, M., 2013. The minimal preprocessing pipelines for the Human Connectome Project. *NeuroImage* 80, 105–24.
- Glatard, T., Lewis, L. B., Ferreira da Silva, R., Adalat, R., Beck, N., Lepage, C., Rioux, P., Rousseau, M.-E., Sherif, T., Deelman, E., et al., 2015. Reproducibility of neuroimaging analyses across operating systems. *Frontiers in neuroinformatics* 9, 12.
- Glover, G. H., Mueller, B. A., Turner, J. A., Van Erp, T. G., Liu, T. T., Greve, D. N., Voyvodic, J. T., Rasmussen, J., Brown, G. G., Keator, D. B., et al., 2012. Function biomedical informatics research network recommendations for prospective multicenter

- functional MRI studies. *Journal of Magnetic Resonance Imaging* 36 (1), 39–54.
- GNC, 2014. The German National Cohort: aims, study design and organization. *European Journal of Epidemiology* 29 (5), 371.
- Gorgolewski, K. J., Auer, T., Calhoun, V. D., Craddock, R. C., Das, S., Duff, E. P., Flandin, G., Ghosh, S. S., Glatard, T., Halchenko, Y. O., et al., 2016. The brain imaging data structure, a format for organizing and describing outputs of neuroimaging experiments. *Scientific Data* 3, 160044.
- Greve, D., Fischl, B., 2009. "Accurate and robust brain image alignment using boundary-based registration". *NeuroImage* 48, 63–72.
- Greve, D. N., Mueller, B. A., Liu, T., Turner, J. A., Voyvodic, J., Yetter, E., Diaz, M., McCarthy, G., Wallace, S., Roach, B. J., et al., 2011. A novel method for quantifying scanner instability in fMRI. *Magnetic resonance in medicine* 65 (4), 1053–1061.
- Griffanti, L., Salimi-Khorshidi, G., Beckmann, C., Auerbach, E., Douaud, G., Sexton, C., Zsoldos, E., Ebmeier, K., Filippini, N., Mackay, C., Moeller, S., Xu, J., Yacoub, E., Baselli, G., Ugurbil, K., Miller, K., Smith, S., 2014. ICA-based artefact removal and accelerated fMRI acquisition for improved Resting State Network imaging. *NeuroImage* 95, 232–247.
- Griffanti, L., Zamboni, G., Khan, A., Li, L., Bonifacio, G., Sundaresan, V., Schulz, U. G., Kuker, W., Battaglini, M., Rothwell, P. M., et al., 2016. BIANCA (Brain Intensity AbNormality Classification Algorithm): A new tool for automated segmentation of white matter hyperintensities. *NeuroImage* 141, 191–205.
- Gronenschild, E. H., Habets, P., Jacobs, H. I., Mengelers, R., Rozendaal, N., Van Os, J., Marcelis, M., 2012. The effects of freesurfer version, workstation type, and macintosh operating system version on anatomical volume and cortical thickness measurements. *PLoS one* 7 (6), e38234.
- Gunstad, J., Cohen, R. A., Tate, D. F., Paul, R. H., Poppas, A., Hoth, K., Macgregor, K. L., Jefferson, A. L., 2005. Blood pressure variability and white matter hyperintensities in older adults with cardiovascular disease. *Blood pressure* 14 (6), 353–358.
- Haacke, E., Xu, Y., Cheng, Y., Reichenbach, J., 2004. Susceptibility-weighted imaging (SWI). *Magnetic Resonance in Medicine* 52, 612–618.
- Hall, M., Frank, E., Holmes, G., Pfahringer, B., Reutemann, P., Witten, I. H., 2009. The weka data mining software: an update. *ACM SIGKDD explorations newsletter* 11 (1), 10–18.
- Hariri, A. R., Tessitore, A., Mattay, V. S., Fera, F., Weinberger, D. R., 2002. The amygdala response to emotional stimuli: a comparison of faces and scenes. *Neuroimage* 17 (1), 317–323.
- Hasan, K. M., 2007. A framework for quality control and parameter optimization in diffusion tensor imaging: theoretical analysis and validation. *Magnetic resonance imaging* 25 (8), 1196–1202.
- Hernández, M., Guerrero, G. D., Cecilia, J. M., García, J. M., Inuggi, A., Jbabdi, S., Behrens, T. E., Sotiropoulos, S. N., 2013. Accelerating fibre orientation estimation from diffusion weighted magnetic resonance imaging using GPUs. *PLoS one* 8 (4), e61892.
- Hyvärinen, A., 1999. Fast and robust fixed-point algorithms for independent component analysis. *IEEE Transactions on Neural Networks* 10 (3), 626–634.
- Jahanshad, N., Kochunov, P. V., Sprooten, E., Mandl, R. C., Nichols, T. E., Almasy, L., Blangero, J., Brouwer, R. M., Curran, J. E., de Zubicaray, G. I., et al., 2013. Multi-site genetic analysis of diffusion images and voxelwise heritability analysis: A pilot project of the ENIGMA-DTI working group. *Neuroimage* 81, 455–469.
- Jbabdi, S., Sotiropoulos, S. N., Savio, A. M., Graña, M., Behrens, T. E., 2012. Model-based analysis of multishell diffusion MR data for tractography: How to get over fitting problems. *Magnetic Resonance in Medicine* 68 (6), 1846–1855.
- Jenkinson, M., Bannister, P., Brady, J., Smith, S., 2002. Improved Optimisation for the Robust and Accurate Linear Registration and Motion Correction of Brain Images. *NeuroImage* 17 (2), 825–841.
- Jenkinson, M., Beckmann, C. F., Behrens, T. E., Woolrich, M. W., Smith, S., 2012. FSL. *Neuroimage* 62 (2), 782–790.
- Jenkinson, M., Smith, S., 2001. A Global Optimisation Method for Robust Affine Registration of Brain Images. *Medical Image Analysis* 5 (2), 143–156.
- Jezzard, P., Balaban, R. S., 1995. Correction for geometric distortion in echo planar images from B0 field variations. *Magnetic resonance in medicine* 34 (1), 65–73.
- John, G. H., Langley, P., 1995. Estimating continuous distributions in bayesian classifiers. In: *Proceedings of the Eleventh conference on Uncertainty in artificial intelligence*. Morgan Kaufmann Publishers Inc., pp. 338–345.
- Kittler, J., Hatef, M., Duin, R. P., Matas, J., 1998. On combining classifiers. *IEEE transactions on pattern analysis and machine intelligence* 20 (3), 226–239.
- Kuncheva, L. I., 2004. *Combining pattern classifiers: methods and algorithms*. John Wiley & Sons.
- Li, X., Morgan, P. S., Ashburner, J., Smith, J., Rorden, C., 2016. The first step for neuroimaging data analysis: DICOM to NIFTI conversion. *Journal of Neuroscience Methods* 264, 47–56.
- Liao, D., Cooper, L., Cai, J., Toole, J. F., Bryan, N. R., Hutchinson, R. G., Tyroler, H. A., 1996. Presence and severity of cerebral white matter lesions and hypertension, its treatment, and its control. *Stroke* 27 (12), 2262–2270.
- Liu, Z., Wang, Y., Gerig, G., Gouttard, S., Tao, R., Fletcher, T., Styner, M., 2010. Quality control of diffusion weighted images. In: *SPIE medical imaging*. International Society for Optics and Photonics, pp. 76280J–76280J.
- Marcus, D. S., Harms, M. P., Snyder, A. Z., Jenkinson, M., Wilson, J. A., Glasser, M. F., Barch, D. M., Archie, K. A., Burgess, G. C., Ramaratnam, M., et al., 2013. Human Connectome Project informatics: quality control, database services, and data visualization. *Neuroimage* 80, 202–219.
- Miller, K. L., Alfaro-Almagro, F., Bangarter, N. K., Thomas, D. L., Yacoub, E., Xu, J., Bartsch, A. J., Jbabdi, S., Sotiropoulos, S. N., Andersson, J. L., Griffanti, L., Douaud, G., Okell, T. W., Weale, P., Dragonu, I., Garratt, S., Hudson, S., Collins, R., Jenkinson, M., Matthews, P. M., Smith, S., 2016. Multimodal population brain imaging in the UK Biobank prospective epidemiological study. *Neuroimage*.
- Moeller, S., Yacoub, E., Olman, C. A., Auerbach, E., Strupp, J., Harel, N., Ugurbil, K., 2010. Multiband multislice ge-epi at 7 tesla, with 16-fold acceleration using partial parallel imaging with application to high spatial and temporal whole-brain fmri. *Magnetic Resonance in Medicine* 63 (5), 1144–1153.
- Moorthy, A. K., Bovik, A. C., 2010. A two-step framework for constructing blind image quality indices. *Signal Processing Letters, IEEE* 17 (5), 513–516.
- Mori, S., Wakana, S., Van Zijl, P. C., Nagae-Poetscher, L., 2005. MRI atlas of human white matter. Vol. 16. *Am Soc Neuroradiology*.
- Mortamet, B., Bernstein, M. A., Jack, C. R., Gunter, J. L., Ward, C., Britson, P. J., Meuli, R., Thiran, J.-P., Krueger, G., 2009. Automatic Quality Assessment in structural brain Magnetic Resonance Imaging. *Magnetic Resonance in Medicine* 62 (2), 365–372.
- Nichols, T., 2013. Notes on creating a standardized version of DVARS.
- Patenaude, B., Smith, S., Kennedy, D., Jenkinson, M., 2011. A Bayesian Model of Shape and Appearance for Subcortical Brain Segmentation. *NeuroImage* 56 (3), 907–922.
- Power, J. D., Barnes, K. A., Snyder, A. Z., Schlaggar, B. L., Petersen, S. E., 2012. Spurious but systematic correlations in functional connectivity MRI networks arise from subject motion. *Neuroimage* 59 (3), 2142–2154.
- Robinson, E. C., Jbabdi, S., Glasser, M. F., Andersson, J. L., Burgess, G. C., Harms, M. P., Smith, S., Van Essen, D. C., Jenkinson, M., 2014. Msm: A new flexible framework for multimodal surface matching. *Neuroimage* 100, 414–426.

- Salimi-Khorshidi, G., Douaud, G., Beckmann, C., Glasser, M., Griffanti, L., Smith, S., 2014. Automatic Denoising of Functional MRI Data: Combining Independent Component Analysis and Hierarchical Fusion of Classifiers. *NeuroImage* 90, 449–468.
- Schram, M. T., Sep, S. J., van der Kallen, C. J., Dagnelie, P. C., Koster, A., Schaper, N., Henry, R. M., Stehouwer, C. D., 2014. The Maastricht Study: an extensive phenotyping study on determinants of type 2 diabetes, its complications and its comorbidities. *European journal of epidemiology* 29 (6), 439–451.
- Smith, S., November 2002. Fast Robust Automated Brain Extraction. *Human Brain Mapping* 17 (3), 143–155.
- Smith, S., 2012. The Future of fMRI Connectivity. *NeuroImage* 62, 1257–1266.
- Smith, S., Beckmann, C. F., Andersson, J. L., Auerbach, E. J., Bijsterbosch, J., Douaud, G., Duff, E., Feinberg, D. A., Griffanti, L., Harms, M. P., et al., 2013. Resting-state fMRI in the human connectome project. *Neuroimage* 80, 144–168.
- Smith, S., Fox, P. T., Miller, K. L., Glahn, D. C., Fox, P. M., Mackay, C. E., Filippini, N., Watkins, K. E., Toro, R., Laird, A. R., et al., 2009. Correspondence of the brain's functional architecture during activation and rest. *Proceedings of the National Academy of Sciences* 106 (31), 13040–13045.
- Smith, S., Hyvärinen, A., Varoquaux, G., Miller, K., Beckmann, C., 2014. Group-PCA for very large fMRI datasets. *NeuroImage* 101, 738–749.
- Smith, S., Jenkinson, M., Johansen-Berg, H., Rueckert, D., Nichols, T. E., Mackay, C. E., Watkins, K. E., Ciccarelli, O., Cader, M. Z., Matthews, P. M., et al., 2006. Tract-based spatial statistics: voxelwise analysis of multi-subject diffusion data. *Neuroimage* 31 (4), 1487–1505.
- Smith, S., Zhang, Y., Jenkinson, M., Chen, J., Matthews, P., Federico, A., De Stefano, N., 2002. Accurate, Robust and Automated Longitudinal and Cross-Sectional Brain Change Analysis. *NeuroImage* 17 (1), 479–489.
- Song, X.-W., Dong, Z.-Y., Long, X.-Y., Li, S.-F., Zuo, X.-N., Zhu, C.-Z., He, Y., Yan, C.-G., Zang, Y.-F., 2011. REST: a toolkit for resting-state functional magnetic resonance imaging data processing. *PloS one* 6 (9), e25031.
- Sotiropoulos, S. N., Jbabdi, S., Xu, J., Andersson, J. L., Moeller, S., Auerbach, E. J., Glasser, M. F., Hernandez, M., Sapiro, G., Jenkinson, M., et al., 2013. Advances in diffusion mri acquisition and processing in the human connectome project. *Neuroimage* 80, 125–143.
- Sudlow, C., Gallacher, J., Allen, N., Beral, V., Burton, P., Danesh, J., Downey, P., Elliott, P., Green, J., Landray, M., et al., 2015. UK Biobank: an Open Access resource for identifying the causes of a wide range of complex diseases of middle and old age. *PLoS medicine* 12 (3), 1–10.
- Vidaurre, D., Quinn, A. J., Baker, A. P., Dupret, D., Tejero-Cantero, A., Woolrich, M. W., 2016. Spectrally resolved fast transient brain states in electrophysiological data. *Neuroimage* 126, 81–95.
- Wakana, S., Caprihan, A., Panzenboeck, M. M., Fallon, J. H., Perry, M., Gollub, R. L., Hua, K., Zhang, J., Jiang, H., Dubey, P., et al., 2007. Reproducibility of quantitative tractography methods applied to cerebral white matter. *Neuroimage* 36 (3), 630–644.
- Wei, X., Warfield, S. K., Zou, K. H., Wu, Y., Li, X., Guimond, A., Mugler, J. P., Benson, R. R., Wolfson, L., Weiner, H. L., et al., 2002. Quantitative analysis of MRI signal abnormalities of brain white matter with high reproducibility and accuracy. *Journal of Magnetic Resonance Imaging* 15 (2), 203–209.
- Woodard, J. P., Carley-Spencer, M. P., 2006. No-reference image quality metrics for structural MRI. *Neuroinformatics* 4 (3), 243–262.
- Woolrich, M., Ripley, B., Brady, J., Smith, S., 2001. Temporal Autocorrelation in Univariate Linear Modelling of fMRI Data. *NeuroImage* 14 (6), 1370–1386.
- Zhang, H., Schneider, T., Wheeler-Kingshott, C. A., Alexander, D. C., 2012. NODDI: practical in vivo neurite orientation dispersion and density imaging of the human brain. *Neuroimage* 61 (4), 1000–1016.
- Zhang, Y., Brady, M., Smith, S., 2001. Segmentation of Brain MR Images through a Hidden Markov Random Field Model and the Expectation Maximization Algorithm. *IEEE Trans. on Medical Imaging* 20 (1), 45–57.
